# Supplementary material
Source: publisher site journal article supplement (https://www.spandidos-publications.com/6237/downloadSupplementary)
Supplement: Supplementary file 1 [file downloadSupplementary]

## Sheet: Sheet1
Table SIII. Results of Pearson's correlation analysis
Glycolysis	lncRNA	correlation	P-value	Regulation
CASP6	AC093726.2	0.560101	5.12994e-45	postive
GALM	AC093726.2	0.519364	7.07344e-38	postive
GUSB	AC093726.2	0.620283	1.45146e-57	postive
B3GAT3	AC007448.4	0.531841	5.8275e-40	postive
B4GALT7	AC007448.4	0.590992	3.96887e-51	postive
GALK1	AC007448.4	0.566968	2.55175e-46	postive
NDUFV3	AC007448.4	0.590749	4.45973e-51	postive
PGLS	AC007448.4	0.619244	2.52235e-57	postive
ABCB6	AC254562.3	0.562673	1.68047e-45	postive
HS2ST1	AC254562.3	-0.507627	5.40593e-36	negative
ABCB6	AC002553.1	0.608101	8.32579e-55	postive
ANKZF1	AC002553.1	0.64019	2.41721e-62	postive
IDUA	AC002553.1	0.600983	3.00397e-53	postive
NASP	AC002553.1	0.505847	1.02857e-35	postive
COPB2	AC124016.1	-0.528823	1.89509e-39	negative
KIF2A	AC098484.1	0.531314	7.16637e-40	postive
B3GAT3	AC027682.6	0.615238	2.08359e-56	postive
PGLS	AC027682.6	0.513546	6.1997e-37	postive
SOD1	AC027682.6	0.523761	1.33356e-38	postive
TXN	AC027682.6	0.525821	6.05061e-39	postive
ABCB6	AL139287.1	0.52111	3.65694e-38	postive
ANKZF1	AL139287.1	0.68273	7.70788e-74	postive
ARTN	AL139287.1	0.588709	1.18276e-50	postive
IDUA	AL139287.1	0.622402	4.67149e-58	postive
NASP	AL139287.1	0.770634	3.42598e-105	postive
CHST6	LINC00092	0.685058	1.58853e-74	postive
GCK	LINC00092	0.529983	1.20612e-39	postive
ABCB6	AC013731.1	0.538771	3.71361e-41	postive
ANKZF1	AC013731.1	0.522913	1.84326e-38	postive
GMPPA	AC013731.1	0.522324	2.30687e-38	postive
GPC3	LINC01116	0.512883	7.91878e-37	postive
SRD5A3	SRD5A3-AS1	0.505307	1.24889e-35	postive
PAXIP1	EIPR1-IT1	0.527095	3.70163e-39	postive
B3GALT6	AC073896.4	0.519879	5.82474e-38	postive
B3GAT3	AC073896.4	0.686329	6.66189e-75	postive
B4GALT7	AC073896.4	0.558503	1.02094e-44	postive
GALK1	AC073896.4	0.567417	2.09211e-46	postive
NDUFV3	AC073896.4	0.594493	7.30673e-52	postive
PGLS	AC073896.4	0.772475	5.37353e-106	postive
TALDO1	AC073896.4	0.527062	3.75027e-39	postive
TXN	AC073896.4	0.575436	5.71793e-48	postive
ANKZF1	ZNF528-AS1	0.55719	1.79171e-44	postive
ARTN	ZNF528-AS1	0.544468	3.67972e-42	postive
IDUA	ZNF528-AS1	0.531722	6.10538e-40	postive
NASP	ZNF528-AS1	0.700934	2.21348e-79	postive
ABCB6	AL162741.1	0.526868	4.04234e-39	postive
ANKZF1	AL162741.1	0.604623	4.85656e-54	postive
ENO3	AL162741.1	0.54538	2.5321e-42	postive
IDUA	AL162741.1	0.553825	7.49434e-44	postive
FUT8	AC004690.2	0.545965	1.99006e-42	postive
LHPP	AC004690.2	0.68079	2.84402e-73	postive
ALDH3A1	AL355601.1	0.721036	5.1853e-86	postive
ANKZF1	AC254562.2	0.506268	8.83635e-36	postive
ABCB6	AP002812.3	0.506163	9.17747e-36	postive
B4GALT4	AL354863.1	0.520227	5.1074e-38	postive
CACNA1H	AL354863.1	0.615677	1.6561e-56	postive
CLDN3	AL354863.1	0.918212	4.12322e-214	postive
GOT2	AL354863.1	0.569215	9.41428e-47	postive
P4HA2	AL354863.1	0.827893	1.90335e-134	postive
PKM	AL354863.1	0.68771	2.57962e-75	postive
PKP2	AL354863.1	0.685961	8.57507e-75	postive
SPAG4	AL354863.1	0.59012	6.02912e-51	postive
CHST6	AL121820.2	0.544542	3.57015e-42	postive
ANKZF1	SNHG10	0.536303	9.97085e-41	postive
NASP	SNHG10	0.53645	9.40578e-41	postive
ZNF292	AC007663.4	0.522915	1.84157e-38	postive
ABCB6	AC021205.3	0.600839	3.22725e-53	postive
ANKZF1	AC021205.3	0.689438	7.80979e-76	postive
IDUA	AC021205.3	0.562422	1.87456e-45	postive
ZNF292	CTBP1-DT	0.538113	4.83606e-41	postive
ECD	AL022313.4	0.543558	5.33966e-42	postive
GALM	AL022313.4	-0.583605	1.31734e-49	negative
HK2	AL022313.4	-0.53115	7.6403e-40	negative
HS2ST1	AL022313.4	-0.532905	3.83403e-40	negative
IL13RA1	AL022313.4	-0.552053	1.58187e-43	negative
PFKM	AL022313.4	0.52632	4.99265e-39	postive
PLOD1	AL022313.4	-0.514172	4.91775e-37	negative
PLOD2	AL022313.4	-0.535851	1.19386e-40	negative
AURKA	MIR924HG	0.565336	5.24e-46	postive
CASP6	MIR924HG	0.595467	4.54852e-52	postive
CENPA	MIR924HG	0.571095	4.06399e-47	postive
DEPDC1	MIR924HG	0.625292	9.81528e-59	postive
KIF20A	MIR924HG	0.557996	1.2687e-44	postive
ANKZF1	AC015727.1	0.511005	1.57922e-36	postive
IER3	MIR222HG	0.529017	1.75709e-39	postive
ALDH1B1	SNHG29	0.530842	8.62141e-40	postive
DPYSL4	SNHG29	0.505868	1.02059e-35	postive
ANKZF1	HNRNPD-DT	0.578285	1.55366e-48	postive
ANKZF1	AC004449.1	0.524556	9.83635e-39	postive
ENO3	AC004449.1	0.560886	3.65261e-45	postive
NASP	AC004449.1	0.500138	7.88531e-35	postive
ABCB6	OCIAD1-AS1	0.586053	4.16788e-50	postive
ANKZF1	OCIAD1-AS1	0.534518	2.02682e-40	postive
KIF2A	MIR325HG	0.60643	1.94799e-54	postive
ZNF292	MIR325HG	0.615877	1.49109e-56	postive
ALDH3A1	LINC02166	0.557442	1.60889e-44	postive
ARPP19	LY86-AS1	0.646344	6.81486e-64	postive
CHST1	LY86-AS1	0.544499	3.63382e-42	postive
ENO2	LY86-AS1	0.827533	3.13385e-134	postive
GOT1	LY86-AS1	0.917483	3.8584e-213	postive
GOT2	LY86-AS1	0.553707	7.87685e-44	postive
GPI	LY86-AS1	0.647048	4.50682e-64	postive
HK1	LY86-AS1	0.746655	2.32797e-95	postive
HOMER1	LY86-AS1	0.741546	2.08655e-93	postive
MDH1	LY86-AS1	0.900963	3.08082e-193	postive
ME1	LY86-AS1	0.63247	1.89671e-60	postive
NDST3	LY86-AS1	0.609055	5.11284e-55	postive
PGAM1	LY86-AS1	0.506712	7.529e-36	postive
PPFIA4	LY86-AS1	0.82052	4.18166e-130	postive
STMN1	LY86-AS1	0.525764	6.18493e-39	postive
UGP2	LY86-AS1	0.660906	1.04671e-67	postive
ARPP19	AC138649.1	0.508305	4.22788e-36	postive
ENO2	AC138649.1	0.745128	9.0243e-95	postive
GOT1	AC138649.1	0.845487	1.06208e-145	postive
GPI	AC138649.1	0.594865	6.09875e-52	postive
HK1	AC138649.1	0.653268	1.1133e-65	postive
HOMER1	AC138649.1	0.621553	7.36437e-58	postive
MDH1	AC138649.1	0.835198	5.8681e-139	postive
ME1	AC138649.1	0.61241	9.08695e-56	postive
PPFIA4	AC138649.1	0.76976	8.20643e-105	postive
STMN1	AC138649.1	0.543322	5.87954e-42	postive
UGP2	AC138649.1	0.653105	1.22737e-65	postive
COL5A1	FZD10-AS1	0.540522	1.8333e-41	postive
LHX9	FZD10-AS1	0.512082	1.06346e-36	postive
TFF3	FZD10-AS1	0.505929	9.98391e-36	postive
TPBG	FZD10-AS1	0.53127	7.28932e-40	postive
CASP6	SNHG26	0.548609	6.66868e-43	postive
GALM	SNHG26	0.573751	1.2283e-47	postive
GUSB	SNHG26	0.541438	1.26535e-41	postive
ALDH3A1	AC005790.1	0.542111	9.62974e-42	postive
ENO2	AC097639.1	0.581651	3.27904e-49	postive
GOT1	AC097639.1	0.660197	1.62344e-67	postive
HK1	AC097639.1	0.582975	1.76911e-49	postive
MDH1	AC097639.1	0.656194	1.89271e-66	postive
ME1	AC097639.1	0.517856	1.2466e-37	postive
PPFIA4	AC097639.1	0.606256	2.1268e-54	postive
ARPP19	MIR600HG	0.505429	1.19535e-35	postive
ENO2	MIR600HG	0.781216	6.38873e-110	postive
GOT1	MIR600HG	0.818211	8.70774e-129	postive
GPI	MIR600HG	0.537826	5.4257e-41	postive
HK1	MIR600HG	0.640396	2.14808e-62	postive
HOMER1	MIR600HG	0.633829	8.87621e-61	postive
MDH1	MIR600HG	0.764815	1.068e-102	postive
NDST3	MIR600HG	0.585686	4.95624e-50	postive
PPFIA4	MIR600HG	0.813999	1.98684e-126	postive
STMN1	MIR600HG	0.516201	2.31395e-37	postive
UGP2	MIR600HG	0.570342	5.69421e-47	postive
ANKZF1	XPC-AS1	0.539933	2.32608e-41	postive
ALDOC	AL161668.4	0.533363	3.20041e-40	postive
B3GAT3	AL049840.5	0.519947	5.67704e-38	postive
B4GALT7	AL049840.5	0.508562	3.85085e-36	postive
GUSB	AL049840.5	0.517954	1.20188e-37	postive
KIF2A	AL049840.5	-0.567487	2.02858e-46	negative
PGLS	AL049840.5	0.567571	1.95475e-46	postive
RBCK1	AL049840.5	0.58837	1.38987e-50	postive
HS2ST1	TGFB2-AS1	0.549678	4.27351e-43	postive
ABCB6	HDHD5-AS1	0.504478	1.6823e-35	postive
ANKZF1	HDHD5-AS1	0.548552	6.82873e-43	postive
NDUFV3	HDHD5-AS1	0.506669	7.64709e-36	postive
GMPPA	U73166.1	0.506135	9.27199e-36	postive
CACNA1H	AC254633.1	0.523041	1.75541e-38	postive
COL5A1	AC254633.1	0.566953	2.56966e-46	postive
LHX9	AC254633.1	0.583975	1.10775e-49	postive
SDC2	AC254633.1	0.528074	2.53443e-39	postive
NASP	AL355802.3	0.518319	1.04782e-37	postive
CHST6	AC025154.2	0.599769	5.48682e-53	postive
ANKZF1	AC006942.1	0.674605	1.70598e-71	postive
IDUA	AC006942.1	0.577355	2.38079e-48	postive
RBCK1	AC006942.1	0.523794	1.31668e-38	postive
NASP	ELOA-AS1	0.609659	3.75193e-55	postive
ARPP19	KRTAP5-AS1	0.554884	4.78623e-44	postive
ENO2	KRTAP5-AS1	0.734475	8.84878e-91	postive
GOT1	KRTAP5-AS1	0.829736	1.45174e-135	postive
GPI	KRTAP5-AS1	0.578366	1.49731e-48	postive
HK1	KRTAP5-AS1	0.698835	1.01275e-78	postive
HOMER1	KRTAP5-AS1	0.689114	9.7768e-76	postive
MDH1	KRTAP5-AS1	0.770727	3.12051e-105	postive
ME1	KRTAP5-AS1	0.552808	1.15127e-43	postive
NDST3	KRTAP5-AS1	0.518622	9.35186e-38	postive
PPFIA4	KRTAP5-AS1	0.80506	1.28454e-121	postive
UGP2	KRTAP5-AS1	0.598546	1.0042e-52	postive
ARPP19	LINC02192	0.531983	5.51079e-40	postive
ENO2	LINC02192	0.750105	1.05056e-96	postive
GOT1	LINC02192	0.837364	2.44702e-140	postive
GPI	LINC02192	0.57012	6.28849e-47	postive
HK1	LINC02192	0.650157	7.16513e-65	postive
HOMER1	LINC02192	0.635243	4.01377e-61	postive
MDH1	LINC02192	0.790935	1.67052e-114	postive
ME1	LINC02192	0.538761	3.72942e-41	postive
NDST3	LINC02192	0.509127	3.1349e-36	postive
PPFIA4	LINC02192	0.722947	1.13218e-86	postive
UGP2	LINC02192	0.585841	4.60714e-50	postive
ABCB6	Z97832.2	0.66329	2.3721e-68	postive
ANKZF1	Z97832.2	0.747853	7.98545e-96	postive
IDUA	Z97832.2	0.596575	2.64616e-52	postive
AURKA	UBL7-AS1	0.565652	4.56092e-46	postive
CDK1	UBL7-AS1	0.545749	2.17498e-42	postive
CENPA	UBL7-AS1	0.513541	6.21176e-37	postive
DEPDC1	UBL7-AS1	0.530613	9.43042e-40	postive
HMMR	UBL7-AS1	0.578399	1.47496e-48	postive
IDH1	UBL7-AS1	0.516233	2.28703e-37	postive
KIF20A	UBL7-AS1	0.537278	6.75707e-41	postive
PAXIP1	UBL7-AS1	0.568163	1.50322e-46	postive
ECD	AL158055.1	0.682212	1.09309e-73	postive
KIF2A	AL158055.1	0.579251	9.95983e-49	postive
ZNF292	AL158055.1	0.567532	1.98815e-46	postive
ENO2	EDIL3-DT	0.512955	7.71129e-37	postive
GOT1	EDIL3-DT	0.588373	1.38769e-50	postive
HK1	EDIL3-DT	0.524168	1.14128e-38	postive
MDH1	EDIL3-DT	0.578453	1.43816e-48	postive
ME1	EDIL3-DT	0.549785	4.08787e-43	postive
PPFIA4	EDIL3-DT	0.586705	3.0637e-50	postive
MED24	LINC01560	0.503601	2.303e-35	postive
PAXIP1	LINC01560	0.500797	6.24639e-35	postive
ZNF292	LINC01560	0.505556	1.14227e-35	postive
B3GAT3	U62317.1	0.59489	6.02352e-52	postive
B4GALT7	U62317.1	0.506779	7.34864e-36	postive
GUSB	U62317.1	0.518154	1.11485e-37	postive
KIF2A	U62317.1	-0.505579	1.13249e-35	negative
PGLS	U62317.1	0.601526	2.2923e-53	postive
RBCK1	U62317.1	0.557981	1.27698e-44	postive
SDHC	U62317.1	-0.541562	1.2035e-41	negative
TXN	U62317.1	0.505052	1.36885e-35	postive
ENO2	LANCL1-AS1	0.598484	1.03535e-52	postive
GOT1	LANCL1-AS1	0.634031	7.92685e-61	postive
MDH1	LANCL1-AS1	0.595394	4.71353e-52	postive
PPFIA4	LANCL1-AS1	0.579574	8.58078e-49	postive
ARTN	AC009812.4	0.544782	3.2363e-42	postive
B3GALT6	AC009812.4	0.504384	1.73994e-35	postive
GALE	AC009812.4	0.507226	6.25163e-36	postive
NASP	AC009812.4	0.595058	5.5515e-52	postive
PSMC4	AC009812.4	0.50703	6.71124e-36	postive
ABCB6	AP001160.1	0.594897	6.00383e-52	postive
ANKZF1	AP001160.1	0.653304	1.08885e-65	postive
B3GAT3	AP001160.1	0.5311	7.7911e-40	postive
ENO3	AP001160.1	0.645933	8.67028e-64	postive
IDUA	AP001160.1	0.540414	1.91526e-41	postive
NDUFV3	AP001160.1	0.529871	1.26003e-39	postive
PGLS	AP001160.1	0.505465	1.18018e-35	postive
ABCB6	PSPC1-AS2	0.511944	1.11883e-36	postive
ANKZF1	PSPC1-AS2	0.548297	7.59223e-43	postive
CASP6	AP001542.3	0.544941	3.03144e-42	postive
ARTN	AC026741.1	0.506912	7.00236e-36	postive
NASP	AC026741.1	0.507099	6.54608e-36	postive
B3GALT6	AC109322.1	0.577391	2.34242e-48	postive
GFUS	AC109322.1	0.625938	6.91121e-59	postive
NDUFV3	AC109322.1	0.517535	1.40596e-37	postive
PGLS	AC109322.1	0.609606	3.85581e-55	postive
ECD	AP000282.1	0.577558	2.16967e-48	postive
ABCB6	AL359881.1	0.50032	7.39515e-35	postive
ANKZF1	AL359881.1	0.510792	1.70696e-36	postive
AK4	TMEM220-AS1	0.568932	1.06819e-46	postive
CASP6	TMEM220-AS1	0.542352	8.73103e-42	postive
CHST6	TMEM220-AS1	0.667473	1.69498e-69	postive
GALM	TMEM220-AS1	0.5795	8.87958e-49	postive
ARPP19	AC134312.1	0.599769	5.48643e-53	postive
CHST1	AC134312.1	0.546856	1.37813e-42	postive
ENO2	AC134312.1	0.725239	1.79427e-87	postive
GOT1	AC134312.1	0.830287	6.68532e-136	postive
GOT2	AC134312.1	0.506178	9.12672e-36	postive
GPI	AC134312.1	0.613545	5.04221e-56	postive
HK1	AC134312.1	0.745676	5.55556e-95	postive
HOMER1	AC134312.1	0.742683	7.74331e-94	postive
MDH1	AC134312.1	0.7872	1.02873e-112	postive
ME1	AC134312.1	0.641879	9.15002e-63	postive
NDST3	AC134312.1	0.576458	3.5896e-48	postive
PPFIA4	AC134312.1	0.818952	3.30132e-129	postive
UGP2	AC134312.1	0.591949	2.50346e-51	postive
AURKA	CRNDE	0.580698	5.10331e-49	postive
CASP6	CRNDE	0.640212	2.38703e-62	postive
CDK1	CRNDE	0.519941	5.68961e-38	postive
CENPA	CRNDE	0.664508	1.10474e-68	postive
DEPDC1	CRNDE	0.651638	2.96036e-65	postive
GMPPB	CRNDE	0.507684	5.29685e-36	postive
GUSB	CRNDE	0.54521	2.71498e-42	postive
HMMR	CRNDE	0.507309	6.06571e-36	postive
KIF20A	CRNDE	0.614653	2.83025e-56	postive
NASP	CRNDE	0.562278	1.99616e-45	postive
ENO2	PPP1R26-AS1	0.634601	5.75996e-61	postive
GOT1	PPP1R26-AS1	0.737701	5.73735e-92	postive
GOT2	PPP1R26-AS1	0.534338	2.17654e-40	postive
GPI	PPP1R26-AS1	0.620781	1.11318e-57	postive
HK1	PPP1R26-AS1	0.682622	8.29472e-74	postive
HOMER1	PPP1R26-AS1	0.667553	1.6116e-69	postive
MDH1	PPP1R26-AS1	0.714417	9.15002e-84	postive
ME1	PPP1R26-AS1	0.567995	1.61986e-46	postive
NDST3	PPP1R26-AS1	0.555669	3.42817e-44	postive
PPFIA4	PPP1R26-AS1	0.726285	7.69552e-88	postive
UGP2	PPP1R26-AS1	0.60007	4.72587e-53	postive
MED24	AC023355.1	0.503277	2.58576e-35	postive
ANKZF1	AL049780.1	0.533823	2.66853e-40	postive
IDUA	AL049780.1	0.515905	2.58452e-37	postive
AKR1A1	LINC02285	0.542894	7.00167e-42	postive
ALDH3B1	LINC02285	0.52203	2.57958e-38	postive
ANG	LINC02285	0.509756	2.49307e-36	postive
B4GALT1	LINC02285	0.509417	2.82088e-36	postive
DSC2	LINC02285	0.533091	3.56276e-40	postive
GLRX	LINC02285	0.535521	1.36167e-40	postive
IL13RA1	LINC02285	0.656958	1.18763e-66	postive
PFKM	LINC02285	-0.50185	4.29847e-35	negative
ABCB6	AC009120.2	0.721231	4.44223e-86	postive
ANKZF1	AC009120.2	0.723642	6.48931e-87	postive
IDUA	AC009120.2	0.664663	1.00265e-68	postive
RBCK1	AC009120.2	0.532691	4.1712e-40	postive
ANKZF1	AC211476.2	0.539693	2.56207e-41	postive
GUSB	AC211476.2	0.519164	7.62693e-38	postive
GFPT1	AC022150.3	0.524974	8.37882e-39	postive
KIF2A	AC022150.3	0.571649	3.16868e-47	postive
ZNF292	AC022150.3	0.638352	6.90644e-62	postive
ANKZF1	LINC02145	0.546827	1.39497e-42	postive
ABCB6	VPS9D1-AS1	0.551713	1.82447e-43	postive
ANKZF1	VPS9D1-AS1	0.536115	1.07468e-40	postive
IDUA	VPS9D1-AS1	0.581803	3.05498e-49	postive
ECD	AC233976.1	0.536845	8.03342e-41	postive
KIF2A	AC233976.1	0.554047	6.82233e-44	postive
ZNF292	AC233976.1	0.517853	1.24796e-37	postive
ABCB6	CTBP1-AS	0.549611	4.39499e-43	postive
ANKZF1	CTBP1-AS	0.637734	9.81625e-62	postive
ARTN	CTBP1-AS	0.509255	2.99267e-36	postive
IDUA	CTBP1-AS	0.665129	7.47546e-69	postive
NASP	CTBP1-AS	0.526073	5.49229e-39	postive
RBCK1	CTBP1-AS	0.50157	4.74851e-35	postive
CACNA1H	AC120498.10	0.701885	1.10625e-79	postive
COL5A1	AC120498.10	0.748055	6.65956e-96	postive
EFNA3	AC120498.10	0.54901	5.6439e-43	postive
EXT1	AC120498.10	0.540081	2.19091e-41	postive
GLCE	AC120498.10	0.598203	1.18921e-52	postive
LHX9	AC120498.10	0.775585	2.26077e-107	postive
SDC1	AC120498.10	0.520534	4.54793e-38	postive
SDC2	AC120498.10	0.561975	2.27757e-45	postive
SRD5A3	AC120498.10	0.5561	2.85376e-44	postive
TPBG	AC120498.10	0.723106	9.96788e-87	postive
ARPP19	AL117372.1	0.525531	6.76535e-39	postive
ENO2	AL117372.1	0.800078	4.82025e-119	postive
GOT1	AL117372.1	0.893665	1.54318e-185	postive
GOT2	AL117372.1	0.523688	1.37139e-38	postive
GPI	AL117372.1	0.647943	2.65993e-64	postive
HK1	AL117372.1	0.709063	5.39834e-82	postive
HOMER1	AL117372.1	0.63998	2.72648e-62	postive
MDH1	AL117372.1	0.869047	3.4155e-163	postive
ME1	AL117372.1	0.5785	1.40747e-48	postive
NDST3	AL117372.1	0.518086	1.14371e-37	postive
PPFIA4	AL117372.1	0.815027	5.34707e-127	postive
STMN1	AL117372.1	0.509112	3.15231e-36	postive
UGP2	AL117372.1	0.686572	5.6406e-75	postive
MED24	LINC00511	0.579837	7.60171e-49	postive
NDUFV3	AC073534.2	0.557491	1.57563e-44	postive
PGLS	AC073534.2	0.54414	4.2088e-42	postive
NASP	NFYC-AS1	0.541422	1.27352e-41	postive
ALDH2	AC109439.1	0.509958	2.31619e-36	postive
ABCB6	AC004908.3	0.629421	1.02683e-59	postive
ANKZF1	AC004908.3	0.646412	6.54769e-64	postive
IDUA	AC004908.3	0.533436	3.11016e-40	postive
GOT1	MUC12-AS1	0.51244	9.32068e-37	postive
MDH1	MUC12-AS1	0.533515	3.01391e-40	postive
UGP2	MUC12-AS1	0.551418	2.06488e-43	postive
NASP	AL592166.1	0.569932	6.83753e-47	postive
B3GAT3	KMT2E-AS1	0.586615	3.19639e-50	postive
B4GALT7	KMT2E-AS1	0.534958	1.70251e-40	postive
GALK1	KMT2E-AS1	0.533513	3.01622e-40	postive
NDUFV3	KMT2E-AS1	0.607949	8.99744e-55	postive
PGLS	KMT2E-AS1	0.623007	3.3748e-58	postive
AKR1A1	MRPL20-AS1	0.538641	3.91226e-41	postive
B3GALT6	MRPL20-AS1	0.601784	2.01536e-53	postive
B4GALT2	MRPL20-AS1	0.574253	9.78927e-48	postive
ECD	MRPL20-AS1	-0.569905	6.92147e-47	negative
GALE	MRPL20-AS1	0.563158	1.36031e-45	postive
NASP	MRPL20-AS1	0.641728	9.98475e-63	postive
PSMC4	MRPL20-AS1	0.595727	4.00628e-52	postive
B3GAT1	AL162171.3	0.607164	1.34165e-54	postive
GOT1	AL162171.3	0.515929	2.56148e-37	postive
NASP	AL603832.1	0.509245	3.00303e-36	postive
ARPP19	AC134312.4	0.576846	3.00516e-48	postive
CHST1	AC134312.4	0.514166	4.92877e-37	postive
ENO2	AC134312.4	0.702242	8.52551e-80	postive
GOT1	AC134312.4	0.809352	6.77137e-124	postive
GPI	AC134312.4	0.605184	3.65956e-54	postive
HK1	AC134312.4	0.722748	1.32776e-86	postive
HOMER1	AC134312.4	0.727489	2.89097e-88	postive
MDH1	AC134312.4	0.766544	1.97173e-103	postive
ME1	AC134312.4	0.623711	2.31019e-58	postive
NDST3	AC134312.4	0.588502	1.30523e-50	postive
PPFIA4	AC134312.4	0.811254	6.34642e-125	postive
UGP2	AC134312.4	0.589511	8.06703e-51	postive
B3GAT3	AC079922.2	0.529353	1.54184e-39	postive
NDUFV3	AC079922.2	0.553751	7.73182e-44	postive
PGLS	AC079922.2	0.517793	1.27632e-37	postive
ABCB6	AP001107.4	0.614652	2.83122e-56	postive
ANKZF1	AP001107.4	0.625979	6.75774e-59	postive
IDUA	AP001107.4	0.604656	4.7756e-54	postive
ABCB6	AC092119.2	0.75688	2.06336e-99	postive
ANKZF1	AC092119.2	0.748247	5.60816e-96	postive
IDUA	AC092119.2	0.627222	3.4314e-59	postive
B3GAT3	ARRDC1-AS1	0.516289	2.23934e-37	postive
B4GALT7	ARRDC1-AS1	0.53508	1.62206e-40	postive
GALK1	ARRDC1-AS1	0.561615	2.66243e-45	postive
NDUFV3	ARRDC1-AS1	0.656251	1.82871e-66	postive
PGLS	ARRDC1-AS1	0.618339	4.07568e-57	postive
ANKZF1	AC099791.2	0.513936	5.36672e-37	postive
IER3	AC243960.3	0.553789	7.60761e-44	postive
B4GALT4	AC012625.1	0.590097	6.09596e-51	postive
CACNA1H	AC012625.1	0.531409	6.90456e-40	postive
CLDN3	AC012625.1	0.862746	3.37465e-158	postive
P4HA2	AC012625.1	0.796521	2.99789e-117	postive
PKM	AC012625.1	0.57225	2.41854e-47	postive
PKP2	AC012625.1	0.62617	6.09098e-59	postive
SPAG4	AC012625.1	0.541197	1.39507e-41	postive
ABCB6	AC011477.1	0.623623	2.4217e-58	postive
ANKZF1	AC011477.1	0.587791	1.83083e-50	postive
GMPPA	AC011477.1	0.502224	3.76374e-35	postive
IDUA	AC011477.1	0.50311	2.7447e-35	postive
ABCB6	AC103691.1	0.500292	7.46962e-35	postive
CASP6	AC060766.3	0.577266	2.47977e-48	postive
GALM	AC060766.3	0.554524	5.57447e-44	postive
GUSB	AC060766.3	0.584983	6.90088e-50	postive
ARTN	RNF32-AS1	0.542667	7.68078e-42	postive
NASP	RNF32-AS1	0.505255	1.27269e-35	postive
NASP	AC093227.1	0.539842	2.41312e-41	postive
CHPF2	ZNF236-DT	0.500295	7.45958e-35	postive
GUSB	ZNF236-DT	0.536646	8.69598e-41	postive
RBCK1	KIF1C-AS1	0.504327	1.77592e-35	postive
ABCB6	AL512770.1	0.606506	1.87423e-54	postive
ANKZF1	AL512770.1	0.623211	3.02413e-58	postive
IDUA	AL512770.1	0.562442	1.85879e-45	postive
KIF2A	AC064807.1	0.551201	2.26153e-43	postive
ZNF292	AC064807.1	0.577533	2.19424e-48	postive
ANKZF1	AC245884.1	0.581628	3.31428e-49	postive
IL13RA1	LINC01736	0.667207	2.00718e-69	postive
CHST6	AC020907.1	0.502041	4.01657e-35	postive
PGLS	ARF4-AS1	0.522199	2.41895e-38	postive
ANKZF1	AC023908.3	0.555873	3.14274e-44	postive
IDUA	AC023908.3	0.536904	7.8457e-41	postive
ARTN	AC090948.3	0.500618	6.65562e-35	postive
ABCB6	AL021707.4	0.626141	6.1884e-59	postive
ANKZF1	AL021707.4	0.633337	1.16914e-60	postive
IDUA	AL021707.4	0.592194	2.22468e-51	postive
CACNA1H	AC008060.3	0.582678	2.03178e-49	postive
COL5A1	AC008060.3	0.750733	5.94593e-97	postive
EFNA3	AC008060.3	0.609196	4.75713e-55	postive
EXT1	AC008060.3	0.551203	2.25936e-43	postive
GLCE	AC008060.3	0.561961	2.29089e-45	postive
LHX9	AC008060.3	0.753931	3.18961e-98	postive
SDC1	AC008060.3	0.509345	2.89619e-36	postive
SDC2	AC008060.3	0.573141	1.61858e-47	postive
SRD5A3	AC008060.3	0.519392	6.99863e-38	postive
TFF3	AC008060.3	0.509802	2.45111e-36	postive
TPBG	AC008060.3	0.711822	6.67602e-83	postive
ARPP19	AC023301.1	0.519986	5.59396e-38	postive
ENO2	AC023301.1	0.56445	7.7331e-46	postive
GOT1	AC023301.1	0.559444	6.81063e-45	postive
HOMER1	AC023301.1	0.52371	1.35969e-38	postive
MDH1	AC023301.1	0.560195	4.92479e-45	postive
PPFIA4	AC023301.1	0.540803	1.63662e-41	postive
STMN1	AC023301.1	0.586078	4.11872e-50	postive
GUSB	AL355974.2	0.508227	4.34899e-36	postive
B3GAT3	ENTPD3-AS1	0.514717	4.01784e-37	postive
NDUFV3	ENTPD3-AS1	0.589626	7.63636e-51	postive
PGLS	ENTPD3-AS1	0.59097	4.0109e-51	postive
AK4	AC093726.1	0.5677	1.84573e-46	postive
CASP6	AC093726.1	0.568233	1.45715e-46	postive
CHST6	AC093726.1	0.583143	1.63553e-49	postive
GALM	AC093726.1	0.567554	1.96963e-46	postive
ANKZF1	AC084824.3	0.503184	2.67288e-35	postive
GMPPA	LRP4-AS1	0.513836	5.56806e-37	postive
ABCB6	AC023282.1	0.551199	2.26323e-43	postive
ANKZF1	AC023282.1	0.586088	4.10053e-50	postive
ANKZF1	AC105137.2	0.519606	6.45796e-38	postive
ZNF292	TMEM30A-DT	0.50474	1.53103e-35	postive
NDUFV3	AC022007.1	0.586169	3.94594e-50	postive
PGLS	AC022007.1	0.511451	1.34069e-36	postive
SLC25A10	AC022007.1	0.561949	2.30283e-45	postive
COL5A1	AL355803.1	0.515942	2.54839e-37	postive
ENO3	AC096708.3	0.569274	9.17136e-47	postive
GOT1	AC009093.4	0.559499	6.64915e-45	postive
HK1	AC009093.4	0.505629	1.11229e-35	postive
HOMER1	AC009093.4	0.564224	8.53614e-46	postive
MDH1	AC009093.4	0.528819	1.89776e-39	postive
PPFIA4	AC009093.4	0.565782	4.30657e-46	postive
GMPPA	AC012213.4	0.590725	4.50994e-51	postive
ALDH3A1	AC247036.1	0.549266	5.07413e-43	postive
PGLS	IDH1-AS1	0.509343	2.89771e-36	postive
ALDH3A1	AC008667.1	0.5112	1.46986e-36	postive
GOT1	AC104836.1	0.512421	9.38754e-37	postive
MDH1	AC104836.1	0.504809	1.49372e-35	postive
ALDH3A1	AC010624.3	0.602205	1.63317e-53	postive
PAXIP1	STARD4-AS1	0.616	1.39785e-56	postive
ZNF292	STARD4-AS1	0.534439	2.09127e-40	postive
ARPP19	AC010857.1	0.517058	1.68033e-37	postive
ENO2	AC010857.1	0.79824	4.11554e-118	postive
GOT1	AC010857.1	0.865673	1.73572e-160	postive
GOT2	AC010857.1	0.514452	4.43338e-37	postive
GPI	AC010857.1	0.607601	1.07441e-54	postive
HK1	AC010857.1	0.666306	3.55498e-69	postive
HOMER1	AC010857.1	0.625366	9.42944e-59	postive
MDH1	AC010857.1	0.866182	6.85252e-161	postive
ME1	AC010857.1	0.5888	1.13281e-50	postive
NDST3	AC010857.1	0.523891	1.26874e-38	postive
PPFIA4	AC010857.1	0.783789	4.12549e-111	postive
UGP2	AC010857.1	0.642504	6.37844e-63	postive
CHST1	AP001972.1	0.532438	4.609e-40	postive
GOT1	AP001972.1	0.520167	5.22537e-38	postive
MDH1	AP001972.1	0.512566	8.89784e-37	postive
ENO2	AC138430.1	0.754843	1.37309e-98	postive
GOT1	AC138430.1	0.832047	5.50775e-137	postive
GOT2	AC138430.1	0.5009	6.02275e-35	postive
GPI	AC138430.1	0.625229	1.01614e-58	postive
HK1	AC138430.1	0.611653	1.34388e-55	postive
HOMER1	AC138430.1	0.57912	1.05793e-48	postive
MDH1	AC138430.1	0.831398	1.38832e-136	postive
PPFIA4	AC138430.1	0.748886	3.15807e-96	postive
UGP2	AC138430.1	0.652794	1.48045e-65	postive
ECD	RUNDC3A-AS1	0.625164	1.05206e-58	postive
GALM	RUNDC3A-AS1	-0.561452	2.85838e-45	negative
GMPPA	RUNDC3A-AS1	0.511192	1.47458e-36	postive
HS2ST1	RUNDC3A-AS1	-0.521841	2.77196e-38	negative
IL13RA1	RUNDC3A-AS1	-0.539419	2.86168e-41	negative
PSMC4	RUNDC3A-AS1	-0.509238	3.01087e-36	negative
ABCB6	AC006557.1	0.541566	1.20139e-41	postive
ANKZF1	AC006557.1	0.510133	2.17217e-36	postive
NASP	AC006557.1	0.543724	4.98963e-42	postive
KIF2A	AC010834.3	0.600893	3.14077e-53	postive
ZNF292	AC010834.3	0.711874	6.41917e-83	postive
IDUA	AC010319.4	0.528343	2.28299e-39	postive
NASP	AC010319.4	0.541049	1.48118e-41	postive
ABCB6	AL161729.4	0.507483	5.69537e-36	postive
ANKZF1	AL161729.4	0.513186	7.08054e-37	postive
NASP	AL161729.4	0.525963	5.72903e-39	postive
ARPP19	AP003721.1	0.56469	6.96024e-46	postive
ENO2	AP003721.1	0.630255	6.48036e-60	postive
GOT1	AP003721.1	0.76082	5.00051e-101	postive
GOT2	AP003721.1	0.520076	5.40813e-38	postive
GPI	AP003721.1	0.649072	1.36473e-64	postive
HK1	AP003721.1	0.698967	9.20821e-79	postive
HOMER1	AP003721.1	0.690839	2.94638e-76	postive
MDH1	AP003721.1	0.746592	2.46177e-95	postive
ME1	AP003721.1	0.57164	3.18153e-47	postive
NDST3	AP003721.1	0.531724	6.10185e-40	postive
PPFIA4	AP003721.1	0.710709	1.55553e-82	postive
UGP2	AP003721.1	0.616949	8.49048e-57	postive
ABCB6	HCG25	0.575909	4.61094e-48	postive
ANKZF1	HCG25	0.595221	5.12812e-52	postive
GMPPA	HCG25	0.529279	1.58705e-39	postive
ANKZF1	DGUOK-AS1	0.50099	5.83385e-35	postive
IDUA	DGUOK-AS1	0.540851	1.60539e-41	postive
ABCB6	SUGT1-DT	0.6574	9.06661e-67	postive
ANKZF1	SUGT1-DT	0.675427	9.95551e-72	postive
IDUA	SUGT1-DT	0.57451	8.711e-48	postive
ENO2	MIR7-3HG	0.639793	3.03406e-62	postive
GOT1	MIR7-3HG	0.662578	3.70005e-68	postive
HK1	MIR7-3HG	0.629307	1.09328e-59	postive
HOMER1	MIR7-3HG	0.5624	1.89297e-45	postive
MDH1	MIR7-3HG	0.605496	3.12563e-54	postive
PFKP	MIR7-3HG	0.500964	5.88768e-35	postive
PGAM1	MIR7-3HG	0.501267	5.28752e-35	postive
PPFIA4	MIR7-3HG	0.652624	1.63933e-65	postive
B3GAT3	AC138696.2	0.618643	3.46981e-57	postive
B4GALT7	AC138696.2	0.577706	2.02749e-48	postive
GALK1	AC138696.2	0.615325	1.99143e-56	postive
GFUS	AC138696.2	0.595301	4.93176e-52	postive
MIF	AC138696.2	0.515095	3.49256e-37	postive
NDUFV3	AC138696.2	0.689662	6.68587e-76	postive
PGLS	AC138696.2	0.704028	2.29704e-80	postive
ABCB6	TTC28-AS1	0.706669	3.24354e-81	postive
ANKZF1	TTC28-AS1	0.72002	1.15786e-85	postive
IDUA	TTC28-AS1	0.50782	5.04103e-36	postive
KIF2A	AC004771.2	0.531911	5.66995e-40	postive
ZNF292	AC004771.2	0.526577	4.52172e-39	postive
FUT8	HPN-AS1	0.506202	9.04933e-36	postive
LHPP	HPN-AS1	0.691442	1.93258e-76	postive
NASP	AC011005.4	0.56981	7.22204e-47	postive
ZNF292	AC027514.2	0.500966	5.88229e-35	postive
LHPP	PICSAR	0.503629	2.27979e-35	postive
ABCB6	AC018635.2	0.650188	7.03285e-65	postive
ANKZF1	AC018635.2	0.64403	2.63216e-63	postive
ABCB6	ERVK13-1	0.517952	1.20247e-37	postive
LHPP	AC012494.1	0.61027	2.74146e-55	postive
ECD	AC083867.2	0.522804	1.92129e-38	postive
KIF2A	AC083867.2	0.530067	1.16708e-39	postive
ZNF292	AC083867.2	0.535086	1.61826e-40	postive
ABCB6	AL109811.1	0.580255	6.26457e-49	postive
ANKZF1	AL109811.1	0.700081	4.11359e-79	postive
ENO3	AL109811.1	0.53151	6.63605e-40	postive
IDUA	AL109811.1	0.577535	2.19235e-48	postive
NASP	AL109811.1	0.527782	2.8383e-39	postive
ALDH3A1	LINC01765	0.616878	8.81406e-57	postive
ABCB6	MUC20-OT1	0.628817	1.43192e-59	postive
ANKZF1	MUC20-OT1	0.649279	1.20723e-64	postive
IDUA	MUC20-OT1	0.587313	2.29684e-50	postive
ISG20	NRIR	0.59646	2.7997e-52	postive
LHPP	AC026691.1	0.559982	5.40037e-45	postive
AKR1A1	AC005632.3	0.57016	6.1754e-47	postive
SOD1	AC036176.1	0.505154	1.31991e-35	postive
NASP	AL050341.2	0.502337	3.6153e-35	postive
ALDH9A1	LINC01338	0.528988	1.77689e-39	postive
GNE	AC104985.1	0.511443	1.34494e-36	postive
KIF2A	AC104985.1	0.568854	1.10563e-46	postive
ZNF292	AC104985.1	0.615189	2.13797e-56	postive
ABCB6	RFPL3S	0.649383	1.13456e-64	postive
ANKZF1	RFPL3S	0.699521	6.16827e-79	postive
ARTN	RFPL3S	0.50465	1.58164e-35	postive
ENO3	RFPL3S	0.647256	3.98844e-64	postive
IDUA	RFPL3S	0.614724	2.72719e-56	postive
NASP	RFPL3S	0.546491	1.60267e-42	postive
ANKZF1	TRIM7-AS1	0.548499	6.98098e-43	postive
ENO3	TRIM7-AS1	0.541494	1.23693e-41	postive
ANKZF1	AC008870.2	0.573616	1.30592e-47	postive
IDUA	AC008870.2	0.5028	3.06512e-35	postive
ABCB6	AL021707.2	0.637355	1.21679e-61	postive
ANKZF1	AL021707.2	0.589715	7.3157e-51	postive
GOT1	AC124852.1	0.517524	1.41181e-37	postive
HK1	AC124852.1	0.530607	9.45026e-40	postive
MDH1	AC124852.1	0.516275	2.25142e-37	postive
ME1	AC124852.1	0.533076	3.58492e-40	postive
PPFIA4	AC124852.1	0.504932	1.42927e-35	postive
UGP2	AC124852.1	0.584581	8.33841e-50	postive
ZNF292	AC060780.1	0.549164	5.29336e-43	postive
CACNA1H	PRDM16-DT	0.78457	1.7822e-111	postive
CLDN3	PRDM16-DT	0.603897	6.99744e-54	postive
P4HA2	PRDM16-DT	0.530171	1.12064e-39	postive
PKM	PRDM16-DT	0.513752	5.74495e-37	postive
TFF3	PRDM16-DT	0.532175	5.11049e-40	postive
ANKZF1	AC131009.3	0.540787	1.64722e-41	postive
IDUA	AC131009.3	0.571299	3.70846e-47	postive
NASP	AC131009.3	0.556772	2.14227e-44	postive
ALDH3B1	AL022318.1	0.542445	8.40445e-42	postive
ABCB6	STAG3L5P-PVRIG2P-PILRB	0.608297	7.53191e-55	postive
ANKZF1	STAG3L5P-PVRIG2P-PILRB	0.708503	8.22012e-82	postive
GUSB	STAG3L5P-PVRIG2P-PILRB	0.543124	6.37385e-42	postive
IDUA	STAG3L5P-PVRIG2P-PILRB	0.6882	1.83974e-75	postive
RBCK1	STAG3L5P-PVRIG2P-PILRB	0.641044	1.48024e-62	postive
B4GALT7	AC023509.3	0.529525	1.4419e-39	postive
NDUFV3	AC023509.3	0.541845	1.07278e-41	postive
ABCB6	AC034102.8	0.545519	2.39111e-42	postive
ANKZF1	AC034102.8	0.584898	7.1829e-50	postive
ECD	LIPE-AS1	-0.58415	1.02083e-49	negative
ABCB6	Z69706.1	0.511323	1.40523e-36	postive
ANKZF1	Z69706.1	0.507095	6.55533e-36	postive
ABCB6	LINC00342	0.745719	5.34597e-95	postive
ANKZF1	LINC00342	0.748805	3.39579e-96	postive
GMPPA	LINC00342	0.544178	4.14413e-42	postive
IDUA	LINC00342	0.636227	2.30471e-61	postive
RBCK1	LINC00342	0.512238	1.00426e-36	postive
ABCB6	AL390728.5	0.537055	7.387e-41	postive
ANKZF1	AL390728.5	0.51998	5.60774e-38	postive
ENO3	AL390728.5	0.533776	2.71838e-40	postive
GUSB	AL390728.5	0.526177	5.27566e-39	postive
IDUA	AL390728.5	0.543006	6.68866e-42	postive
NASP	AL390728.5	0.561875	2.3781e-45	postive
RBCK1	AL390728.5	0.500704	6.45547e-35	postive
KIF2A	AC019080.1	0.501202	5.41111e-35	postive
ZNF292	AC019080.1	0.671158	1.60025e-70	postive
ABCB6	AC027601.1	0.512433	9.34528e-37	postive
ANKZF1	AC027601.1	0.675486	9.5769e-72	postive
ARTN	AC027601.1	0.584005	1.09243e-49	postive
IDUA	AC027601.1	0.703725	2.8702e-80	postive
NASP	AC027601.1	0.58447	8.7837e-50	postive
RBCK1	AC027601.1	0.522447	2.20091e-38	postive
ENO2	AC079336.5	0.578882	1.18068e-48	postive
GOT1	AC079336.5	0.6731	4.54977e-71	postive
GPI	AC079336.5	0.50494	1.42523e-35	postive
HK1	AC079336.5	0.564428	7.80787e-46	postive
HOMER1	AC079336.5	0.555038	4.48269e-44	postive
MDH1	AC079336.5	0.616634	1.00214e-56	postive
NDST3	AC079336.5	0.544106	4.26926e-42	postive
PPFIA4	AC079336.5	0.651157	3.94818e-65	postive
UGP2	AC079336.5	0.519045	7.97741e-38	postive
LHPP	LINC02882	0.735381	4.11816e-91	postive
B3GAT3	RAB11B-AS1	0.645315	1.24511e-63	postive
B4GALT7	RAB11B-AS1	0.550361	3.214e-43	postive
GALK1	RAB11B-AS1	0.52197	2.63878e-38	postive
NDUFV3	RAB11B-AS1	0.564544	7.41827e-46	postive
PGLS	RAB11B-AS1	0.680251	4.07874e-73	postive
RBCK1	RAB11B-AS1	0.502303	3.65936e-35	postive
SLC25A10	RAB11B-AS1	0.576619	3.33456e-48	postive
LHPP	AC009090.3	0.544725	3.31214e-42	postive
ARPP19	LINC01106	0.583012	1.73882e-49	postive
CHST1	LINC01106	0.530692	9.14223e-40	postive
ENO2	LINC01106	0.819124	2.6331e-129	postive
GOT1	LINC01106	0.923309	3.56415e-221	postive
GOT2	LINC01106	0.555498	3.68714e-44	postive
GPI	LINC01106	0.653185	1.16979e-65	postive
HK1	LINC01106	0.748071	6.56531e-96	postive
HOMER1	LINC01106	0.718171	4.95363e-85	postive
MDH1	LINC01106	0.907471	1.25123e-200	postive
ME1	LINC01106	0.643249	4.14255e-63	postive
NDST3	LINC01106	0.585091	6.56072e-50	postive
PGAM1	LINC01106	0.50307	2.78356e-35	postive
PPFIA4	LINC01106	0.832771	1.95582e-137	postive
STMN1	LINC01106	0.501946	4.15469e-35	postive
UGP2	LINC01106	0.678022	1.79902e-72	postive
PGLS	AC006449.6	0.52986	1.26517e-39	postive
ABCB6	AC010615.2	0.564836	6.52702e-46	postive
ANKZF1	AC010615.2	0.570408	5.52696e-47	postive
ZNF292	SMAD9-IT1	0.543804	4.8304e-42	postive
ABCB6	NFE2L1-DT	0.568404	1.35087e-46	postive
ANKZF1	NFE2L1-DT	0.554739	5.08803e-44	postive
CACNA1H	GATA2-AS1	0.534927	1.7237e-40	postive
COL5A1	GATA2-AS1	0.514174	4.91428e-37	postive
EFNA3	GATA2-AS1	0.50861	3.78453e-36	postive
TFF3	GATA2-AS1	0.615995	1.40137e-56	postive
IL13RA1	LINC00578	0.550585	2.92657e-43	postive
NDUFV3	AC009309.1	0.590535	4.94195e-51	postive
PGLS	AC009309.1	0.54057	1.79809e-41	postive
PGLS	SNHG7	0.529529	1.43966e-39	postive
ANKZF1	AL355075.2	0.541011	1.50456e-41	postive
IDUA	AL355075.2	0.536457	9.37987e-41	postive
ZNF292	AL355075.2	0.515858	2.6299e-37	postive
ABCB6	AL117339.3	0.511557	1.28983e-36	postive
ZNF292	AL117339.3	0.511115	1.51668e-36	postive
ENO2	AC095032.1	0.520208	5.14435e-38	postive
GOT1	AC095032.1	0.544413	3.76409e-42	postive
MDH1	AC095032.1	0.568699	1.18461e-46	postive
NDST3	AC095032.1	0.503357	2.51245e-35	postive
PPFIA4	AC095032.1	0.519727	6.16852e-38	postive
ABCB6	AC015961.2	0.647913	2.70836e-64	postive
ANKZF1	AC015961.2	0.683273	5.33833e-74	postive
ENO3	AC015961.2	0.525971	5.71112e-39	postive
IDUA	AC015961.2	0.552486	1.31831e-43	postive
B3GAT3	FGD5-AS1	-0.587108	2.53037e-50	negative
KIF2A	FGD5-AS1	0.512349	9.63916e-37	postive
ZNF292	FGD5-AS1	0.544249	4.02614e-42	postive
ARPP19	LINC00621	0.53796	5.14218e-41	postive
ENO2	LINC00621	0.550166	3.48675e-43	postive
GOT1	LINC00621	0.605799	2.68119e-54	postive
HK1	LINC00621	0.507493	5.67635e-36	postive
HOMER1	LINC00621	0.532933	3.79194e-40	postive
MDH1	LINC00621	0.583123	1.65115e-49	postive
NDST3	LINC00621	0.585264	6.04639e-50	postive
PPFIA4	LINC00621	0.612944	6.89026e-56	postive
KIF2A	AL731577.2	0.584649	8.07487e-50	postive
GALM	EPB41L4A-AS1	-0.525844	5.99767e-39	negative
GMPPA	EPB41L4A-AS1	0.552861	1.12554e-43	postive
HS2ST1	EPB41L4A-AS1	-0.554737	5.09409e-44	negative
PLOD2	EPB41L4A-AS1	-0.523621	1.40662e-38	negative
ABCB6	ZNF32-AS2	0.549928	3.85104e-43	postive
ANKZF1	ZNF32-AS2	0.567616	1.91625e-46	postive
ZNF292	ZNF32-AS2	0.615097	2.24412e-56	postive
GNE	AC019205.1	0.510044	2.24432e-36	postive
KIF2A	AC019205.1	0.524459	1.02108e-38	postive
ZNF292	AC019205.1	0.65719	1.03069e-66	postive
ABCB6	CSGALNACT2-DT	0.577086	2.69327e-48	postive
ANKZF1	CSGALNACT2-DT	0.520119	5.32157e-38	postive
ABCB6	AC004253.1	0.71326	2.22551e-83	postive
ANKZF1	AC004253.1	0.730119	3.33879e-89	postive
IDUA	AC004253.1	0.633111	1.32667e-60	postive
RBCK1	AC004253.1	0.510149	2.15977e-36	postive
UGP2	ALOX12-AS1	-0.536237	1.02383e-40	negative
CD44	AC061992.2	0.63016	6.83109e-60	postive
GLRX	AC061992.2	0.59566	4.13954e-52	postive
HSPA5	AC061992.2	0.525758	6.20002e-39	postive
PYGL	AC061992.2	0.533099	3.55152e-40	postive
SLC16A3	AC061992.2	0.562434	1.86529e-45	postive
TPST1	AC061992.2	0.628983	1.30681e-59	postive
ABCB6	AL117336.2	0.598003	1.31245e-52	postive
ANKZF1	AL117336.2	0.657869	6.80424e-67	postive
IDUA	AL117336.2	0.505035	1.3776e-35	postive
ALDH3A1	LINC00880	0.520147	5.26501e-38	postive
ABCB6	AC012368.1	0.516888	1.79086e-37	postive
ANKZF1	AC012368.1	0.596473	2.78102e-52	postive
IDUA	AC012368.1	0.530252	1.08566e-39	postive
MED24	AC022211.2	0.53331	3.26841e-40	postive
ZNF292	AC022211.2	0.561502	2.79668e-45	postive
B3GALT6	AC091138.1	0.525255	7.52355e-39	postive
B4GALT2	AC091138.1	0.526542	4.58276e-39	postive
ABCB6	AC114730.3	0.660311	1.51329e-67	postive
ANKZF1	AC114730.3	0.720746	6.52274e-86	postive
IDUA	AC114730.3	0.669501	4.6444e-70	postive
CACNA1H	LINC01389	0.57331	1.4994e-47	postive
EFNA3	LINC01389	0.595779	3.90464e-52	postive
TFF3	LINC01389	0.722048	2.3197e-86	postive
ANKZF1	POC1B-AS1	0.500603	6.69049e-35	postive
ANKZF1	SAP30-DT	0.501443	4.96692e-35	postive
SAP30	SAP30-DT	0.620132	1.57347e-57	postive
GLRX	AC008750.1	0.514456	4.42624e-37	postive
SLC16A3	AC008750.1	0.503702	2.22097e-35	postive
G6PC2	AC093802.1	0.524424	1.03476e-38	postive
GMPPA	AC093802.1	0.515858	2.6296e-37	postive
NSDHL	AC093802.1	0.511588	1.27506e-36	postive
ALDH9A1	LYPLAL1-DT	0.538536	4.08141e-41	postive
ZNF292	ARPP21-AS1	0.547704	9.70642e-43	postive
ABCB6	AL359091.1	0.522791	1.93116e-38	postive
GAL3ST1	AL359091.1	0.659961	1.87925e-67	postive
ENO2	AL020994.2	0.526135	5.36314e-39	postive
GOT1	AL020994.2	0.611061	1.82468e-55	postive
MDH1	AL020994.2	0.573301	1.50586e-47	postive
PPFIA4	AL020994.2	0.532626	4.2793e-40	postive
ZNF292	AC090607.1	0.513182	7.09122e-37	postive
ENO2	AC110619.1	0.618602	3.54676e-57	postive
GOT1	AC110619.1	0.685215	1.4271e-74	postive
GPI	AC110619.1	0.529262	1.59756e-39	postive
HK1	AC110619.1	0.623024	3.34527e-58	postive
HOMER1	AC110619.1	0.574426	9.04993e-48	postive
MDH1	AC110619.1	0.637186	1.33985e-61	postive
PPFIA4	AC110619.1	0.747667	9.42796e-96	postive
UGP2	AC110619.1	0.61714	7.67703e-57	postive
ANKZF1	AL357078.2	0.62071	1.15579e-57	postive
ECD	FAM66C	0.523829	1.2996e-38	postive
ZNF292	FAM66C	0.598883	8.50364e-53	postive
LHPP	AC015712.4	0.536518	9.15256e-41	postive
ABCB6	PSMA3-AS1	0.627647	2.72024e-59	postive
ANKZF1	PSMA3-AS1	0.621347	8.22346e-58	postive
IDUA	PSMA3-AS1	0.628706	1.52196e-59	postive
NASP	PSMA3-AS1	0.53037	1.03677e-39	postive
ENO3	AP000553.2	0.56794	1.65944e-46	postive
NASP	AP000553.2	0.53515	1.57777e-40	postive
ABCB6	AC096642.1	0.659995	1.84025e-67	postive
ANKZF1	AC096642.1	0.67775	2.15395e-72	postive
IDUA	AC096642.1	0.53422	2.28105e-40	postive
FUT8	KCNJ2-AS1	0.526535	4.59593e-39	postive
LHPP	KCNJ2-AS1	0.526228	5.17299e-39	postive
ABCB6	AC109460.1	0.528247	2.36986e-39	postive
ANKZF1	AC109460.1	0.542971	6.78427e-42	postive
IDUA	AC109460.1	0.521874	2.73762e-38	postive
B4GALT4	SMC5-AS1	0.538392	4.3243e-41	postive
ENO2	AC090907.2	0.591819	2.66594e-51	postive
GOT1	AC090907.2	0.641713	1.00671e-62	postive
GPI	AC090907.2	0.526556	4.55963e-39	postive
HK1	AC090907.2	0.518909	8.39532e-38	postive
MDH1	AC090907.2	0.655166	3.53556e-66	postive
PPFIA4	AC090907.2	0.57258	2.08511e-47	postive
UGP2	AC090907.2	0.538629	3.93138e-41	postive
ABCB6	AC080013.2	0.507561	5.53663e-36	postive
ANKZF1	AC108471.2	0.554385	5.91226e-44	postive
ABCB6	ASMTL-AS1	0.655808	2.39395e-66	postive
ANKZF1	ASMTL-AS1	0.707644	1.56599e-81	postive
IDUA	ASMTL-AS1	0.692037	1.27423e-76	postive
RBCK1	ASMTL-AS1	0.562647	1.70028e-45	postive
CACNA1H	DIO3OS	0.547101	1.24569e-42	postive
EFNA3	DIO3OS	0.644453	2.05787e-63	postive
TFF3	DIO3OS	0.716436	1.91859e-84	postive
B4GALT4	C5orf67	0.521122	3.64095e-38	postive
CLDN3	C5orf67	0.77462	6.07477e-107	postive
P4HA2	C5orf67	0.689814	6.0136e-76	postive
PKM	C5orf67	0.548186	7.94989e-43	postive
PKP2	C5orf67	0.521363	3.32267e-38	postive
PLOD1	C5orf67	0.510832	1.68239e-36	postive
SPAG4	C5orf67	0.528802	1.9101e-39	postive
CASP6	AC025171.3	0.541602	1.18381e-41	postive
KIF2A	AC011477.3	0.541078	1.46431e-41	postive
ZNF292	AC011477.3	0.534618	1.94829e-40	postive
GALE	ZNF529-AS1	0.535454	1.39821e-40	postive
NASP	ZNF529-AS1	0.507945	4.81769e-36	postive
PSMC4	ZNF529-AS1	0.558315	1.10641e-44	postive
CHST6	CA3-AS1	0.605532	3.06917e-54	postive
UGP2	CLCA4-AS1	0.520615	4.4107e-38	postive
ANKZF1	AP003096.1	0.537147	7.11955e-41	postive
IDUA	AP003096.1	0.500729	6.39812e-35	postive
IL13RA1	AC012150.1	0.590529	4.95528e-51	postive
ANKZF1	AL357079.1	0.551748	1.79747e-43	postive
ZNF292	AP001469.2	0.627638	2.73389e-59	postive
ENO2	IDI2-AS1	0.519662	6.32261e-38	postive
GOT1	IDI2-AS1	0.626115	6.27716e-59	postive
MDH1	IDI2-AS1	0.579446	9.10353e-49	postive
ME1	IDI2-AS1	0.594352	7.82773e-52	postive
PPFIA4	IDI2-AS1	0.552257	1.45184e-43	postive
GUSB	APTR	0.513617	6.03919e-37	postive
CHST6	LINC00886	0.586676	3.10527e-50	postive
GALM	LINC00886	0.504371	1.74788e-35	postive
GNE	AC018730.1	0.500869	6.08994e-35	postive
ZNF292	AC018730.1	0.594382	7.71276e-52	postive
ARPP19	AL109946.1	0.618239	4.29746e-57	postive
CHST1	AL109946.1	0.52869	1.99556e-39	postive
ENO2	AL109946.1	0.792012	5.01312e-115	postive
GOT1	AL109946.1	0.88506	3.76913e-177	postive
GOT2	AL109946.1	0.546609	1.52636e-42	postive
GPI	AL109946.1	0.639261	4.11161e-62	postive
HK1	AL109946.1	0.768923	1.88545e-104	postive
HOMER1	AL109946.1	0.748352	5.10467e-96	postive
MDH1	AL109946.1	0.864526	1.38765e-159	postive
ME1	AL109946.1	0.638281	7.19219e-62	postive
NDST3	AL109946.1	0.604199	6.0097e-54	postive
PFKP	AL109946.1	0.509812	2.44269e-36	postive
PGAM1	AL109946.1	0.525608	6.56762e-39	postive
PPFIA4	AL109946.1	0.846474	2.25576e-146	postive
UGP2	AL109946.1	0.649264	1.21777e-64	postive
ALDH2	ARHGEF26-AS1	0.522448	2.20053e-38	postive
ALDH9A1	ARHGEF26-AS1	0.589969	6.47965e-51	postive
SDHC	ARHGEF26-AS1	0.503657	2.25741e-35	postive
AK4	PLBD1-AS1	0.567769	1.78991e-46	postive
CHST6	PLBD1-AS1	0.583371	1.46994e-49	postive
GALM	PLBD1-AS1	0.517363	1.49965e-37	postive
GMPPB	PLBD1-AS1	0.503981	2.01015e-35	postive
HS2ST1	PLBD1-AS1	0.525113	7.94563e-39	postive
IRS2	AL442128.2	0.612188	1.01935e-55	postive
ARTN	AC012073.1	0.543567	5.31946e-42	postive
AURKA	AC012073.1	0.789793	5.94067e-114	postive
CDK1	AC012073.1	0.708861	6.2824e-82	postive
CENPA	AC012073.1	0.833938	3.64988e-138	postive
DEPDC1	AC012073.1	0.805185	1.10515e-121	postive
GALE	AC012073.1	0.50262	3.26858e-35	postive
GUSB	AC012073.1	0.513057	7.4269e-37	postive
HMMR	AC012073.1	0.684723	1.99514e-74	postive
KIF20A	AC012073.1	0.777011	5.19976e-108	postive
NASP	AC012073.1	0.739783	9.60725e-93	postive
ABCB6	AC010245.2	0.659579	2.37824e-67	postive
ANKZF1	AC010245.2	0.680432	3.61257e-73	postive
IDUA	AC010245.2	0.59308	1.45005e-51	postive
RBCK1	AC010245.2	0.527721	2.90585e-39	postive
B4GALT1	AC145098.1	0.504527	1.65287e-35	postive
DSC2	AC145098.1	0.581009	4.41852e-49	postive
GALM	AC145098.1	0.569064	1.00686e-46	postive
GLRX	AC145098.1	0.619946	1.73692e-57	postive
HK2	AC145098.1	0.535462	1.39378e-40	postive
HK3	AC145098.1	0.577847	1.89986e-48	postive
IL13RA1	AC145098.1	0.539846	2.40886e-41	postive
ISG20	AC145098.1	0.531905	5.68316e-40	postive
PYGL	AC145098.1	0.544943	3.02966e-42	postive
SLC16A3	AC145098.1	0.627729	2.60011e-59	postive
PPFIA4	LINC02043	0.512538	8.99196e-37	postive
ZNF292	RBM5-AS1	0.554277	6.18874e-44	postive
ARPP19	LINC01616	0.579621	8.39743e-49	postive
CHST1	LINC01616	0.571638	3.18542e-47	postive
ENO2	LINC01616	0.776966	5.44558e-108	postive
GOT1	LINC01616	0.885245	2.52846e-177	postive
GOT2	LINC01616	0.527239	3.50225e-39	postive
GPI	LINC01616	0.635937	2.71406e-61	postive
HK1	LINC01616	0.751066	4.39281e-97	postive
HOMER1	LINC01616	0.689549	7.22857e-76	postive
MDH1	LINC01616	0.880402	6.93436e-173	postive
ME1	LINC01616	0.661847	5.83598e-68	postive
NDST3	LINC01616	0.542282	8.98405e-42	postive
PFKP	LINC01616	0.510939	1.61787e-36	postive
PGAM1	LINC01616	0.51369	5.87699e-37	postive
PPFIA4	LINC01616	0.794002	5.31693e-116	postive
STMN1	LINC01616	0.502698	3.17839e-35	postive
UGP2	LINC01616	0.65646	1.60954e-66	postive
ANKZF1	AC022098.1	0.56172	2.54367e-45	postive
ENO2	LINC00622	0.680344	3.83204e-73	postive
GOT1	LINC00622	0.719315	2.01831e-85	postive
GPI	LINC00622	0.550633	2.86827e-43	postive
HK1	LINC00622	0.577025	2.76942e-48	postive
HOMER1	LINC00622	0.579186	1.02647e-48	postive
MDH1	LINC00622	0.74825	5.59489e-96	postive
ME1	LINC00622	0.504133	1.90343e-35	postive
PPFIA4	LINC00622	0.696923	3.99913e-78	postive
STMN1	LINC00622	0.584861	7.30919e-50	postive
UGP2	LINC00622	0.60312	1.03326e-53	postive
ZNF292	AC105206.2	0.526206	5.21765e-39	postive
ECD	EBLN3P	0.586353	3.61774e-50	postive
GFPT1	EBLN3P	0.554908	4.73586e-44	postive
GNE	EBLN3P	0.643882	2.86958e-63	postive
KIF2A	EBLN3P	0.609096	5.0076e-55	postive
ZNF292	EBLN3P	0.683949	3.37721e-74	postive
GUSB	AC107464.2	0.506006	9.71296e-36	postive
GMPPA	ADCY6-DT	0.506808	7.27081e-36	postive
NDUFV3	ADCY6-DT	0.595381	4.74356e-52	postive
PGLS	ADCY6-DT	0.50513	1.33095e-35	postive
ZNF292	AP000866.1	0.59384	1.00375e-51	postive
B3GALT6	NUP153-AS1	0.511958	1.1132e-36	postive
PGLS	NUP153-AS1	0.521278	3.43227e-38	postive
GPC4	AC021755.2	0.634383	6.50825e-61	postive
B3GALT6	AP001505.1	0.569985	6.67948e-47	postive
B3GAT3	AP001505.1	0.648781	1.62088e-64	postive
B4GALT7	AP001505.1	0.563954	9.60607e-46	postive
GALK1	AP001505.1	0.607111	1.37801e-54	postive
GFUS	AP001505.1	0.51751	1.41897e-37	postive
NDUFV3	AP001505.1	0.757917	7.79979e-100	postive
PGLS	AP001505.1	0.701882	1.10864e-79	postive
POLR3K	AP001505.1	0.555741	3.32532e-44	postive
SLC25A10	AP001505.1	0.512648	8.63537e-37	postive
ENO2	CYP4A22-AS1	0.528328	2.29619e-39	postive
GOT1	CYP4A22-AS1	0.596864	2.29677e-52	postive
HOMER1	CYP4A22-AS1	0.542224	9.19824e-42	postive
MDH1	CYP4A22-AS1	0.558202	1.16139e-44	postive
PPFIA4	CYP4A22-AS1	0.608836	5.71821e-55	postive
ZNF292	LINC00667	0.551556	1.94882e-43	postive
ALDH3A1	LINC01778	0.642813	5.33518e-63	postive
SDC3	LINC01778	0.560928	3.58739e-45	postive
ECD	LINC01719	0.643844	2.93358e-63	postive
GNE	LINC01719	0.504446	1.70145e-35	postive
KIF2A	LINC01719	0.581302	3.85623e-49	postive
ZNF292	LINC01719	0.570671	4.91416e-47	postive
ABCB6	AL121890.5	0.578383	1.4857e-48	postive
ANKZF1	AL121890.5	0.567063	2.44736e-46	postive
ABCB6	AP002812.2	0.507076	6.60068e-36	postive
ANKZF1	AP002812.2	0.602442	1.45087e-53	postive
CACNA1H	AC008443.3	0.61085	2.03401e-55	postive
COL5A1	AC008443.3	0.73316	2.66673e-90	postive
EFNA3	AC008443.3	0.625222	1.0197e-58	postive
EXT1	AC008443.3	0.521605	3.03168e-38	postive
GLCE	AC008443.3	0.585396	5.68158e-50	postive
LHX9	AC008443.3	0.734634	7.73789e-91	postive
SDC2	AC008443.3	0.561079	3.36005e-45	postive
SRD5A3	AC008443.3	0.51313	7.22725e-37	postive
TFF3	AC008443.3	0.622628	4.13904e-58	postive
TPBG	AC008443.3	0.74226	1.11984e-93	postive
ABCB6	AC012645.4	0.639913	2.8323e-62	postive
ANKZF1	AC012645.4	0.660051	1.77665e-67	postive
ENO3	AC012645.4	0.56555	4.76978e-46	postive
IDUA	AC012645.4	0.561923	2.32964e-45	postive
RBCK1	AC012645.4	0.514028	5.18704e-37	postive
ANKZF1	AL132989.1	0.508261	4.29593e-36	postive
IDUA	AL132989.1	0.526639	4.41452e-39	postive
ZNF292	AL132989.1	0.510767	1.72286e-36	postive
GMPPA	AC099778.1	0.514645	4.12749e-37	postive
ABCB6	AL391807.1	0.672276	7.77109e-71	postive
ANKZF1	AL391807.1	0.708932	5.95642e-82	postive
IDUA	AL391807.1	0.599588	6.00167e-53	postive
ECD	AC012213.1	0.644529	1.96943e-63	postive
GALM	AC012213.1	-0.530963	8.22233e-40	negative
GMPPA	AC012213.1	0.540188	2.09819e-41	postive
ZNF292	AC012213.1	0.518948	8.27243e-38	postive
TFF3	AC007277.1	0.54904	5.57475e-43	postive
ANKZF1	AC129510.1	0.565067	5.8976e-46	postive
IDUA	AC129510.1	0.578563	1.36752e-48	postive
NASP	AC129510.1	0.531465	6.75331e-40	postive
IL13RA1	AC002480.1	0.561937	2.31495e-45	postive
NDUFV3	AC046143.2	0.508585	3.81901e-36	postive
PGLS	AC046143.2	0.527728	2.89777e-39	postive
GOT1	AC091729.2	0.512665	8.58003e-37	postive
HK1	AC091729.2	0.501295	5.23452e-35	postive
PPFIA4	AC091729.2	0.51265	8.62791e-37	postive
ABCB6	AL662884.1	0.557471	1.58872e-44	postive
ANKZF1	AL662884.1	0.589609	7.69594e-51	postive
IDUA	AL662884.1	0.610795	2.09304e-55	postive
GLCE	LINC02693	0.524553	9.84846e-39	postive
ARTN	AC004951.4	0.522073	2.53793e-38	postive
B4GALT1	AC002091.2	0.585936	4.40516e-50	postive
CXCR4	AC002091.2	0.54658	1.54432e-42	postive
DSC2	AC002091.2	0.534717	1.87348e-40	postive
IL13RA1	AC002091.2	0.64311	4.4914e-63	postive
MERTK	AC002091.2	0.523087	1.72492e-38	postive
ABCB6	AL031714.1	0.578973	1.13232e-48	postive
ANKZF1	AL031714.1	0.657603	8.01032e-67	postive
IDUA	AL031714.1	0.642178	7.6991e-63	postive
NASP	AL031714.1	0.608552	6.61244e-55	postive
ANKZF1	LINC01772	0.633416	1.11874e-60	postive
IDUA	LINC01772	0.533161	3.46649e-40	postive
NASP	LINC01772	0.565598	4.67038e-46	postive
ANKZF1	AC018638.6	0.544036	4.39199e-42	postive
ARTN	AC018638.6	0.527469	3.20416e-39	postive
ABCB6	AC127024.6	0.547187	1.20226e-42	postive
ANKZF1	AC127024.6	0.628557	1.65141e-59	postive
IDUA	AC127024.6	0.510371	1.99171e-36	postive
ABCB6	AL158063.1	0.520455	4.68657e-38	postive
ANKZF1	AL158063.1	0.550143	3.52061e-43	postive
ABCB6	AC010536.1	0.502516	3.39181e-35	postive
MED24	AC010536.1	0.509813	2.4413e-36	postive
ABCB6	AC020558.2	0.709947	2.77077e-82	postive
ANKZF1	AC020558.2	0.678648	1.18738e-72	postive
IDUA	AC020558.2	0.596468	2.78813e-52	postive
ARPP19	AL158212.3	0.516465	2.09726e-37	postive
CASP6	AL158212.3	-0.519769	6.07161e-38	negative
ENO2	AL158212.3	0.543297	5.94123e-42	postive
GOT1	AL158212.3	0.557204	1.78128e-44	postive
GUSB	AL158212.3	-0.582294	2.43052e-49	negative
PPFIA4	AL158212.3	0.556436	2.47264e-44	postive
ZNF292	AL157400.4	0.556268	2.65643e-44	postive
ENO3	SCGB1B2P	0.530648	9.29945e-40	postive
ANKZF1	AC073842.2	0.537338	6.597e-41	postive
IDUA	AC073842.2	0.562292	1.98395e-45	postive
NASP	AC073842.2	0.531715	6.12303e-40	postive
PAXIP1	AC073842.2	0.502266	3.70766e-35	postive
ANKZF1	AL450998.2	0.528568	2.09197e-39	postive
IDUA	AL450998.2	0.561569	2.71695e-45	postive
NASP	AL450998.2	0.544522	3.60054e-42	postive
ECD	AC025917.1	0.522317	2.31298e-38	postive
ZNF292	AC025917.1	0.632008	2.4525e-60	postive
ANKZF1	AL135999.1	0.521231	3.49286e-38	postive
ARTN	AL135999.1	0.510703	1.76342e-36	postive
IDUA	AL135999.1	0.545492	2.41792e-42	postive
B3GAT3	AC104187.1	0.505527	1.15396e-35	postive
NDUFV3	AC104187.1	0.592708	1.73618e-51	postive
PGLS	AC104187.1	0.602507	1.4045e-53	postive
ABCB6	AC012615.6	0.606711	1.68876e-54	postive
ANKZF1	AC012615.6	0.675667	8.50885e-72	postive
IDUA	AC012615.6	0.723883	5.34829e-87	postive
RBCK1	AC012615.6	0.52698	3.87053e-39	postive
FAM162A	LINC-PINT	0.509191	3.06366e-36	postive
MDH1	NUP50-DT	0.500005	8.2659e-35	postive
AK4	NRAV	0.524216	1.12052e-38	postive
ALDH3A1	NRAV	0.563799	1.02834e-45	postive
CASP6	NRAV	0.54595	2.0025e-42	postive
CHST6	NRAV	0.556117	2.83262e-44	postive
GALM	NRAV	0.547795	9.34874e-43	postive
GCK	NRAV	0.506928	6.96285e-36	postive
GMPPB	NRAV	0.531582	6.45137e-40	postive
PDK3	NRAV	0.506841	7.1855e-36	postive
DPYSL4	AL135925.1	0.561744	2.51766e-45	postive
ALDH3A1	ZNF474-AS1	0.560962	3.53427e-45	postive
GNE	GLIDR	0.502028	4.03578e-35	postive
ABCB6	AGBL5-IT1	0.521685	2.94125e-38	postive
ANKZF1	AGBL5-IT1	0.502271	3.70132e-35	postive
ECD	AC004158.1	0.574869	7.40215e-48	postive
NSDHL	AC004158.1	0.501898	4.2265e-35	postive
ZNF292	AC004158.1	0.546477	1.61164e-42	postive
ALDH3A1	AC084880.3	0.751996	1.88252e-97	postive
GCK	AC084880.3	0.513469	6.3786e-37	postive
NDUFV3	AL121601.1	0.590478	5.07753e-51	postive
ENO2	LINC01122	0.580737	5.01215e-49	postive
GOT1	LINC01122	0.525647	6.47146e-39	postive
PPFIA4	LINC01122	0.51211	1.05241e-36	postive
CASP6	PSMB8-AS1	0.545586	2.32647e-42	postive
GALM	PSMB8-AS1	0.538128	4.80803e-41	postive
GLRX	PSMB8-AS1	0.587168	2.46042e-50	postive
GUSB	PSMB8-AS1	0.538703	3.81642e-41	postive
ISG20	PSMB8-AS1	0.506851	7.15879e-36	postive
PYGL	PSMB8-AS1	0.512694	8.48978e-37	postive
TPST1	PSMB8-AS1	0.532111	5.23991e-40	postive
ABCB6	AC011468.1	0.501736	4.47706e-35	postive
ANKZF1	AC011468.1	0.605296	3.45785e-54	postive
IDUA	AC011468.1	0.506821	7.2366e-36	postive
NASP	AC011468.1	0.578167	1.6406e-48	postive
IDUA	AL031717.1	0.501535	4.80698e-35	postive
NDUFV3	AL163051.1	0.594271	8.14004e-52	postive
PGLS	AL163051.1	0.584732	7.76749e-50	postive
CHST6	NINJ2-AS1	0.5387	3.82119e-41	postive
IL13RA1	NINJ2-AS1	0.531107	7.77173e-40	postive
GUSB	STARD7-AS1	0.555295	4.01963e-44	postive
ARPP19	LINC01123	0.589582	7.79623e-51	postive
CHST1	LINC01123	0.545664	2.2525e-42	postive
ENO2	LINC01123	0.785508	6.47719e-112	postive
GOT1	LINC01123	0.879066	1.07556e-171	postive
GOT2	LINC01123	0.518281	1.06301e-37	postive
GPI	LINC01123	0.631754	2.8249e-60	postive
HK1	LINC01123	0.712695	3.42835e-83	postive
HOMER1	LINC01123	0.698176	1.62722e-78	postive
MDH1	LINC01123	0.866673	2.78443e-161	postive
ME1	LINC01123	0.614973	2.39446e-56	postive
NDST3	LINC01123	0.555164	4.24991e-44	postive
PPFIA4	LINC01123	0.813666	3.03173e-126	postive
UGP2	LINC01123	0.62811	2.11049e-59	postive
CD44	AP003071.4	0.603229	9.78449e-54	postive
ABCB6	Z84485.1	0.577171	2.59077e-48	postive
ANKZF1	Z84485.1	0.576674	3.2517e-48	postive
ENO3	Z84485.1	0.530397	1.02581e-39	postive
IDUA	Z84485.1	0.516788	1.85888e-37	postive
ARPP19	AF111167.2	0.528058	2.55043e-39	postive
ENO2	AF111167.2	0.657287	9.71389e-67	postive
GOT1	AF111167.2	0.770294	4.81191e-105	postive
HK1	AF111167.2	0.623825	2.17232e-58	postive
HOMER1	AF111167.2	0.5857	4.92428e-50	postive
MDH1	AF111167.2	0.739752	9.86052e-93	postive
ME1	AF111167.2	0.597882	1.39266e-52	postive
NDST3	AF111167.2	0.552031	1.59599e-43	postive
PPFIA4	AF111167.2	0.663526	2.04586e-68	postive
UGP2	AF111167.2	0.586842	2.8711e-50	postive
ABCB6	AC106886.3	0.55737	1.65882e-44	postive
ANKZF1	AC106886.3	0.591929	2.52785e-51	postive
ABCB6	AC104985.2	0.530096	1.15411e-39	postive
GALM	AL645933.2	0.512528	9.02585e-37	postive
CENPA	AL137060.3	0.509909	2.35773e-36	postive
LHPP	LINC00320	0.606199	2.18961e-54	postive
CHST6	AC022034.1	0.507662	5.3387e-36	postive
NASP	AC006504.5	0.52265	2.03782e-38	postive
ABCB6	AC078909.2	0.643092	4.53816e-63	postive
ANKZF1	AC078909.2	0.653404	1.02528e-65	postive
ENO3	AC078909.2	0.532545	4.41745e-40	postive
IDUA	AC078909.2	0.533868	2.62162e-40	postive
GCLC	AL033397.2	0.563902	9.82829e-46	postive
PAXIP1	AC114956.2	0.501831	4.32805e-35	postive
ALDH3A1	AC009495.3	0.634739	5.32819e-61	postive
B4GALT4	AL353801.1	0.569017	1.02824e-46	postive
CACNA1H	AL353801.1	0.632664	1.70242e-60	postive
CLDN3	AL353801.1	0.932535	2.67883e-235	postive
GOT2	AL353801.1	0.541408	1.28109e-41	postive
P4HA2	AL353801.1	0.841856	2.88854e-143	postive
PKM	AL353801.1	0.672081	8.81354e-71	postive
PKP2	AL353801.1	0.680142	4.38838e-73	postive
SPAG4	AL353801.1	0.594444	7.48291e-52	postive
ENO3	AC009407.1	0.502989	2.86583e-35	postive
CHST6	SBF2-AS1	0.511365	1.38402e-36	postive
UGP2	SBF2-AS1	0.509289	2.95606e-36	postive
GPI	LINC02609	0.635138	4.25768e-61	postive
MDH1	LINC02609	0.504877	1.45755e-35	postive
UGP2	LINC02609	0.587022	2.63609e-50	postive
CHST6	LINC01285	0.557736	1.41864e-44	postive
FUT8	LINC01285	0.520957	3.87596e-38	postive
GOT1	AC069213.1	0.531124	7.71798e-40	postive
HK1	AC069213.1	0.506298	8.74318e-36	postive
HOMER1	AC069213.1	0.502409	3.52307e-35	postive
MDH1	AC069213.1	0.529853	1.26871e-39	postive
ENO2	UMODL1-AS1	0.545678	2.23988e-42	postive
GOT1	UMODL1-AS1	0.640378	2.17042e-62	postive
MDH1	UMODL1-AS1	0.612109	1.06181e-55	postive
PPFIA4	UMODL1-AS1	0.573613	1.30782e-47	postive
ENO2	AC122707.1	0.532344	4.78173e-40	postive
GPI	AC128687.2	0.630767	4.88406e-60	postive
UGP2	AC128687.2	0.540302	2.00431e-41	postive
CHST6	AC018816.1	0.593232	1.34765e-51	postive
GALM	AC018816.1	0.521107	3.66144e-38	postive
GCK	AC018816.1	0.506617	7.79143e-36	postive
ENO3	AL365181.2	0.514472	4.40032e-37	postive
GUSB	AP001486.2	-0.551854	1.7195e-43	negative
ECD	AC084036.1	-0.50135	5.13487e-35	negative
KIF2A	AC084036.1	-0.557154	1.81979e-44	negative
ABCB6	CAPN10-DT	0.694852	1.74853e-77	postive
ANKZF1	CAPN10-DT	0.751387	3.28064e-97	postive
IDUA	CAPN10-DT	0.655475	2.93148e-66	postive
RBCK1	CAPN10-DT	0.513821	5.60051e-37	postive
ARPP19	AC000403.1	0.517773	1.2861e-37	postive
CHST1	AC000403.1	0.563591	1.12613e-45	postive
ENO2	AC000403.1	0.647288	3.91446e-64	postive
GOT1	AC000403.1	0.756629	2.60879e-99	postive
GPI	AC000403.1	0.604619	4.86579e-54	postive
HK1	AC000403.1	0.667588	1.57565e-69	postive
HOMER1	AC000403.1	0.665553	5.71998e-69	postive
MDH1	AC000403.1	0.723104	9.98893e-87	postive
ME1	AC000403.1	0.564673	7.01239e-46	postive
NDST3	AC000403.1	0.59783	1.42876e-52	postive
PPFIA4	AC000403.1	0.715098	5.40806e-84	postive
UGP2	AC000403.1	0.616772	9.31829e-57	postive
ABCB6	AC069281.2	0.625285	9.85521e-59	postive
ANKZF1	AC069281.2	0.73885	2.14406e-92	postive
ENO3	AC069281.2	0.547831	9.21056e-43	postive
IDUA	AC069281.2	0.670753	2.07801e-70	postive
ECD	AC069224.1	0.571192	3.89082e-47	postive
ZNF292	AC069224.1	0.531073	7.87389e-40	postive
GMPPB	LINC01995	0.518403	1.01525e-37	postive
ALDH3A1	AC010255.1	0.58439	9.12099e-50	postive
AK4	LINC01273	0.507185	6.34405e-36	postive
CHST6	LINC01273	0.556619	2.28732e-44	postive
GOT1	EMX2OS	0.599198	7.27866e-53	postive
HK1	EMX2OS	0.591451	3.18267e-51	postive
MDH1	EMX2OS	0.522451	2.19768e-38	postive
ME1	EMX2OS	0.612506	8.64425e-56	postive
PPFIA4	EMX2OS	0.560601	4.13136e-45	postive
UGP2	EMX2OS	0.50195	4.14906e-35	postive
NASP	RHOQ-AS1	0.514313	4.66757e-37	postive
GALE	AL391834.2	-0.512446	9.29987e-37	negative
MXI1	AL391834.2	0.502911	2.9463e-35	postive
GPI	AC010504.1	0.51799	1.18534e-37	postive
ABCB6	AL731569.1	0.702478	7.17198e-80	postive
ANKZF1	AL731569.1	0.631788	2.77146e-60	postive
ABCB6	AC004448.2	0.566857	2.68101e-46	postive
ANKZF1	AC004448.2	0.605124	3.77114e-54	postive
ABCB6	AC245060.6	0.560783	3.8196e-45	postive
ANKZF1	AC245060.6	0.570666	4.92412e-47	postive
IDUA	AC245060.6	0.534721	1.87049e-40	postive
ZNF292	AC245060.6	0.535153	1.57545e-40	postive
B3GALT6	AL121832.2	0.51417	4.92231e-37	postive
B3GAT3	AL121832.2	0.57725	2.49801e-48	postive
B4GALT7	AL121832.2	0.554841	4.87302e-44	postive
GALK1	AL121832.2	0.548508	6.95368e-43	postive
NDUFV3	AL121832.2	0.619908	1.77264e-57	postive
PGLS	AL121832.2	0.663376	2.2471e-68	postive
RBCK1	AL121832.2	0.503432	2.44624e-35	postive
ZNF292	Z99716.1	0.513368	6.62107e-37	postive
ENO2	AC093424.1	0.54282	7.21715e-42	postive
GOT1	AC093424.1	0.621324	8.32503e-58	postive
MDH1	AC093424.1	0.630225	6.58963e-60	postive
PPFIA4	AC093424.1	0.55585	3.17387e-44	postive
UGP2	AC093424.1	0.535296	1.48884e-40	postive
ABCB6	AL359504.1	0.566985	2.53357e-46	postive
ANKZF1	AL359504.1	0.664004	1.51605e-68	postive
ENO3	AL359504.1	0.597005	2.14275e-52	postive
IDUA	AL359504.1	0.562131	2.12843e-45	postive
NASP	AL359504.1	0.550195	3.44474e-43	postive
GPI	CPNE8-AS1	0.542875	7.05616e-42	postive
UGP2	CPNE8-AS1	0.55092	2.5434e-43	postive
B3GALT6	AL451085.2	0.551368	2.10876e-43	postive
B3GAT3	AL451085.2	0.54864	6.58213e-43	postive
B4GALT7	AL451085.2	0.582772	1.94444e-49	postive
GALK1	AL451085.2	0.58025	6.2791e-49	postive
NDUFV3	AL451085.2	0.597109	2.0366e-52	postive
PGLS	AL451085.2	0.661791	6.04399e-68	postive
ABCB6	AC018809.1	0.568647	1.21233e-46	postive
ANKZF1	AC018809.1	0.632762	1.61168e-60	postive
IDUA	AC018809.1	0.613412	5.40313e-56	postive
ABCB6	AC092681.3	0.527502	3.16305e-39	postive
ANKZF1	AC092681.3	0.539051	3.31851e-41	postive
ANKZF1	AC137932.1	0.518297	1.05654e-37	postive
ABCB6	AC004148.1	0.795243	1.29701e-116	postive
ANKZF1	AC004148.1	0.778871	7.51675e-109	postive
ENO3	AC004148.1	0.53023	1.09515e-39	postive
IDUA	AC004148.1	0.698051	1.781e-78	postive
NASP	AC004148.1	0.519445	6.85984e-38	postive
AK4	AL121895.2	0.543526	5.411e-42	postive
ABCB6	AC087742.1	0.545609	2.30412e-42	postive
ANKZF1	AC087742.1	0.52268	2.01406e-38	postive
ARPP19	AC015712.7	0.567681	1.86166e-46	postive
CHST1	AC015712.7	0.509319	2.92352e-36	postive
ENO2	AC015712.7	0.806797	1.56334e-122	postive
GOT1	AC015712.7	0.883242	1.82937e-175	postive
GPI	AC015712.7	0.589754	7.18267e-51	postive
HK1	AC015712.7	0.688241	1.78811e-75	postive
HOMER1	AC015712.7	0.665169	7.28942e-69	postive
MDH1	AC015712.7	0.873678	4.94086e-167	postive
ME1	AC015712.7	0.589873	6.78403e-51	postive
NDST3	AC015712.7	0.529799	1.29553e-39	postive
PPFIA4	AC015712.7	0.801789	6.421e-120	postive
UGP2	AC015712.7	0.65756	8.22423e-67	postive
ALDH3A1	AL162258.2	0.506512	8.09147e-36	postive
ENO3	AL451050.2	0.501611	4.67903e-35	postive
NDUFV3	LINC01971	0.542817	7.22495e-42	postive
SLC25A10	LINC01971	0.510965	1.60223e-36	postive
ARPP19	AC046130.2	0.584084	1.05264e-49	postive
HOMER1	AC046130.2	0.565254	5.43201e-46	postive
ABCB6	ELF3-AS1	0.584886	7.22301e-50	postive
ANKZF1	ELF3-AS1	0.67289	5.21803e-71	postive
IDUA	ELF3-AS1	0.61202	1.11217e-55	postive
NASP	ELF3-AS1	0.519495	6.73343e-38	postive
ALDH3A1	LINC02526	0.605501	3.11799e-54	postive
ABCB6	SPAG5-AS1	0.503608	2.29656e-35	postive
ANKZF1	SPAG5-AS1	0.583191	1.59916e-49	postive
IDUA	SPAG5-AS1	0.500249	7.58229e-35	postive
ALDH3A1	AC027237.3	0.547356	1.12075e-42	postive
LHPP	AL513190.1	0.608859	5.65232e-55	postive
GUSB	MYG1-AS1	0.519345	7.1252e-38	postive
ALDH2	ZNF710-AS1	0.601281	2.59018e-53	postive
CAPN5	MIR4435-2HG	0.551844	1.72653e-43	postive
CHPF2	MIR4435-2HG	0.645555	1.08166e-63	postive
HSPA5	MIR4435-2HG	0.552949	1.08449e-43	postive
IGFBP3	MIR4435-2HG	0.552523	1.29815e-43	postive
ISG20	MIR4435-2HG	0.580017	6.99236e-49	postive
LDHA	MIR4435-2HG	0.612769	7.54238e-56	postive
PGM2	MIR4435-2HG	0.515577	2.92005e-37	postive
PMM2	MIR4435-2HG	0.591733	2.77809e-51	postive
PYGL	MIR4435-2HG	0.553577	8.32256e-44	postive
RARS1	MIR4435-2HG	0.513928	5.38189e-37	postive
ALDH3A1	AL121899.1	0.594133	8.70454e-52	postive
GUSB	AC009403.1	0.501116	5.57817e-35	postive
PAXIP1	AC009403.1	0.554778	5.00478e-44	postive
ECD	AL135999.3	0.618218	4.34607e-57	postive
NSDHL	AL135999.3	0.502305	3.65617e-35	postive
ENO2	AC025287.2	0.502062	3.98654e-35	postive
AKR1A1	EMC1-AS1	0.540906	1.56947e-41	postive
ECD	EMC1-AS1	-0.501028	5.75501e-35	negative
ANKZF1	AL645608.1	0.509052	3.22208e-36	postive
B3GAT3	AC020765.2	0.507419	5.8298e-36	postive
NDUFV3	AC020765.2	0.561326	3.01914e-45	postive
PGLS	AC020765.2	0.536858	7.99298e-41	postive
ABCB6	AL080317.2	0.519355	7.09875e-38	postive
ANKZF1	AL080317.2	0.597354	1.80581e-52	postive
IDUA	AL080317.2	0.571232	3.82135e-47	postive
NASP	AL080317.2	0.515626	2.86677e-37	postive
B3GAT3	SNHG19	0.513436	6.45737e-37	postive
NDUFV3	SNHG19	0.607924	9.1128e-55	postive
PGLS	SNHG19	0.593201	1.36754e-51	postive
B4GALT7	AP006333.2	0.50958	2.65802e-36	postive
NDUFV3	AP006333.2	0.550941	2.52144e-43	postive
ABCB6	AL159169.2	0.559713	6.06479e-45	postive
ANKZF1	AL159169.2	0.579742	7.94276e-49	postive
IDUA	AL159169.2	0.545087	2.85492e-42	postive
IDUA	AL049840.2	0.515597	2.89764e-37	postive
B3GALT6	RASSF1-AS1	0.50361	2.29571e-35	postive
B3GAT3	RASSF1-AS1	0.519997	5.57219e-38	postive
GALK1	RASSF1-AS1	0.519572	6.54016e-38	postive
NDUFV3	RASSF1-AS1	0.586047	4.18101e-50	postive
PGLS	RASSF1-AS1	0.642179	7.69754e-63	postive
ZNF292	LINC00928	0.590018	6.33124e-51	postive
NDUFV3	AC010654.1	0.50816	4.45714e-36	postive
NDUFV3	AC005759.1	0.512571	8.88259e-37	postive
ECD	RGMB-AS1	0.564608	7.21294e-46	postive
GNE	RGMB-AS1	0.560036	5.27605e-45	postive
KIF2A	RGMB-AS1	0.545487	2.42276e-42	postive
ZNF292	RGMB-AS1	0.60177	2.02983e-53	postive
ABCB6	MRPL23-AS1	0.515548	2.95178e-37	postive
B3GAT3	AC026304.1	0.537201	6.96756e-41	postive
B4GALT7	AC026304.1	0.567675	1.86603e-46	postive
GALK1	AC026304.1	0.507074	6.60409e-36	postive
NDUFV3	AC026304.1	0.651037	4.24105e-65	postive
PGLS	AC026304.1	0.651948	2.45925e-65	postive
NDUFV3	AC008946.1	0.523035	1.75935e-38	postive
LHPP	PACRG-AS1	0.613133	6.24426e-56	postive
ABCB6	AC126118.1	0.698596	1.2031e-78	postive
ANKZF1	AC126118.1	0.71709	1.15329e-84	postive
ENO3	AC126118.1	0.510783	1.71305e-36	postive
IDUA	AC126118.1	0.579299	9.7452e-49	postive
FKBP4	ITFG2-AS1	0.552219	1.4748e-43	postive
COL5A1	PCOLCE-AS1	0.550132	3.53567e-43	postive
LHX9	PCOLCE-AS1	0.517358	1.50227e-37	postive
TPBG	PCOLCE-AS1	0.506211	9.01926e-36	postive
IGFBP3	PRECSIT	0.579195	1.02199e-48	postive
ISG20	PRECSIT	0.506196	9.06803e-36	postive
ANKZF1	AL033384.2	0.560695	3.96661e-45	postive
ABCB6	LINC01786	0.633039	1.38056e-60	postive
ANKZF1	LINC01786	0.688357	1.65038e-75	postive
IDUA	LINC01786	0.701181	1.84963e-79	postive
GMPPA	TUBA3FP	0.516105	2.39819e-37	postive
BPNT1	AL358472.2	0.503828	2.12334e-35	postive
ABCB6	AL359881.2	0.505125	1.33366e-35	postive
B4GALT7	LAMA5-AS1	0.513301	6.78613e-37	postive
NDUFV3	LAMA5-AS1	0.55074	2.74247e-43	postive
PGLS	LAMA5-AS1	0.568385	1.36198e-46	postive
GUSB	LINC01176	0.510234	2.09404e-36	postive
ABCB6	AL136295.2	0.571218	3.84534e-47	postive
ANKZF1	AL136295.2	0.643845	2.93099e-63	postive
IDUA	AL136295.2	0.551089	2.36956e-43	postive
RBCK1	AL136295.2	0.538604	3.97143e-41	postive
AURKA	LINC00664	0.676838	3.9346e-72	postive
CDK1	LINC00664	0.713757	1.5202e-83	postive
CENPA	LINC00664	0.690179	4.66556e-76	postive
DEPDC1	LINC00664	0.581085	4.26394e-49	postive
HMMR	LINC00664	0.658661	4.18562e-67	postive
KIF20A	LINC00664	0.67006	3.24592e-70	postive
PAXIP1	LINC00664	0.50558	1.13235e-35	postive
ENO3	AL137127.1	0.572297	2.36794e-47	postive
GALE	AL137127.1	0.503257	2.60362e-35	postive
CAPN5	SLCO4A1-AS1	0.523392	1.53555e-38	postive
COL5A1	ADIRF-AS1	0.609491	4.09063e-55	postive
LHX9	ADIRF-AS1	0.634433	6.3287e-61	postive
SDC2	ADIRF-AS1	0.598209	1.18592e-52	postive
TPBG	ADIRF-AS1	0.692486	9.2953e-77	postive
ABCB6	AC027682.4	0.646119	7.7778e-64	postive
ANKZF1	AC027682.4	0.690779	3.07225e-76	postive
IDUA	AC027682.4	0.568452	1.3222e-46	postive
ARPP19	LINC00507	0.575688	5.09835e-48	postive
ENO2	LINC00507	0.744889	1.11416e-94	postive
GOT1	LINC00507	0.822237	4.24406e-131	postive
GOT2	LINC00507	0.517854	1.24754e-37	postive
GPI	LINC00507	0.574204	1.00058e-47	postive
HK1	LINC00507	0.669136	5.8666e-70	postive
HOMER1	LINC00507	0.693627	4.1635e-77	postive
MDH1	LINC00507	0.800956	1.71779e-119	postive
ME1	LINC00507	0.527061	3.75158e-39	postive
NDST3	LINC00507	0.594774	6.37401e-52	postive
PPFIA4	LINC00507	0.759164	2.40883e-100	postive
UGP2	LINC00507	0.576088	4.24888e-48	postive
ABCB6	AP000873.3	0.501704	4.52723e-35	postive
ANKZF1	AP000873.3	0.569941	6.81154e-47	postive
ABCB6	AC009955.4	0.723496	7.2954e-87	postive
ANKZF1	AC009955.4	0.680321	3.89174e-73	postive
IDUA	AC009955.4	0.547074	1.25985e-42	postive
ECD	NUTM2B-AS1	0.646345	6.81162e-64	postive
ABCB6	AC009754.1	0.527192	3.56598e-39	postive
ANKZF1	AC009754.1	0.532669	4.20758e-40	postive
ABCB6	AL450384.2	0.589066	9.97407e-51	postive
ANKZF1	AL450384.2	0.652298	1.9937e-65	postive
ENO2	AC017076.1	0.681875	1.37165e-73	postive
GOT1	AC017076.1	0.782416	1.78896e-110	postive
GPI	AC017076.1	0.560959	3.53963e-45	postive
HK1	AC017076.1	0.5911	3.76776e-51	postive
HOMER1	AC017076.1	0.571948	2.77083e-47	postive
MDH1	AC017076.1	0.794413	3.33542e-116	postive
ME1	AC017076.1	0.544556	3.54967e-42	postive
PPFIA4	AC017076.1	0.716808	1.43565e-84	postive
STMN1	AC017076.1	0.503152	2.70386e-35	postive
UGP2	AC017076.1	0.67067	2.19276e-70	postive
FUT8	AC106881.1	0.526477	4.70072e-39	postive
GOT1	AC106881.1	0.655516	2.8592e-66	postive
MDH1	AC106881.1	0.610725	2.16983e-55	postive
ME1	AC106881.1	0.563525	1.159e-45	postive
PPFIA4	AC106881.1	0.563261	1.30081e-45	postive
UGP2	AC106881.1	0.560361	4.58321e-45	postive
ARPP19	AC010931.1	0.51609	2.41186e-37	postive
CHST1	AC010931.1	0.538948	3.4581e-41	postive
ENO2	AC010931.1	0.711403	9.18286e-83	postive
GOT1	AC010931.1	0.822314	3.82825e-131	postive
GPI	AC010931.1	0.609795	3.49957e-55	postive
HK1	AC010931.1	0.698864	9.9184e-79	postive
HOMER1	AC010931.1	0.628589	1.62287e-59	postive
MDH1	AC010931.1	0.774453	7.20766e-107	postive
ME1	AC010931.1	0.640112	2.52716e-62	postive
PPFIA4	AC010931.1	0.712479	4.04477e-83	postive
UGP2	AC010931.1	0.652977	1.32581e-65	postive
ANKZF1	AC027796.4	0.578807	1.22214e-48	postive
IDUA	AC027796.4	0.546246	1.77247e-42	postive
RBCK1	AC027796.4	0.561001	3.47461e-45	postive
GPC1	CNIH3-AS2	0.507884	4.92545e-36	postive
ECD	AC000068.1	0.51795	1.20346e-37	postive
ZNF292	AC000068.1	0.55547	3.73086e-44	postive
ANKZF1	AC093535.1	0.52598	5.69178e-39	postive
GCLC	AC093535.1	0.501207	5.40062e-35	postive
NDUFV3	LINC02158	0.501093	5.62456e-35	postive
B3GAT3	AC145423.1	0.660741	1.15966e-67	postive
B4GALT7	AC145423.1	0.538349	4.39991e-41	postive
GALK1	AC145423.1	0.5061	9.38742e-36	postive
NDUFV3	AC145423.1	0.507205	6.29871e-36	postive
PGLS	AC145423.1	0.656298	1.77626e-66	postive
RBCK1	AC145423.1	0.516791	1.85663e-37	postive
ABCB6	AC132938.1	0.603696	7.73911e-54	postive
ANKZF1	AC132938.1	0.539274	3.0329e-41	postive
GMPPA	AC132938.1	0.522893	1.85773e-38	postive
RBCK1	AC132938.1	0.511921	1.12841e-36	postive
ABCB6	AC010300.1	0.593912	9.69045e-52	postive
ANKZF1	AC010300.1	0.59047	5.09729e-51	postive
IDUA	AC010300.1	0.504995	1.39713e-35	postive
CD44	LINC00601	0.512935	7.76745e-37	postive
CHST6	LINC00601	0.558898	8.61216e-45	postive
NDUFV3	AC011472.4	0.502373	3.56922e-35	postive
LHPP	LINC00323	0.615213	2.11141e-56	postive
COG2	NNT-AS1	0.526558	4.55483e-39	postive
ECD	NNT-AS1	0.604078	6.38917e-54	postive
KIF2A	NNT-AS1	0.555171	4.23708e-44	postive
RRAGD	NNT-AS1	0.525686	6.37357e-39	postive
ZNF292	NNT-AS1	0.586071	4.13274e-50	postive
ARPP19	LINC01331	0.575235	6.2665e-48	postive
ENO2	LINC01331	0.683374	4.98746e-74	postive
GOT1	LINC01331	0.776876	5.97669e-108	postive
GPI	LINC01331	0.556061	2.90086e-44	postive
HK1	LINC01331	0.62436	1.62675e-58	postive
HOMER1	LINC01331	0.664422	1.16673e-68	postive
MDH1	LINC01331	0.769118	1.55346e-104	postive
ME1	LINC01331	0.512591	8.81833e-37	postive
NDST3	LINC01331	0.519918	5.73925e-38	postive
PPFIA4	LINC01331	0.722783	1.29055e-86	postive
UGP2	LINC01331	0.57515	6.5146e-48	postive
CACNA1H	AL354694.1	0.554017	6.90797e-44	postive
CLDN3	AL354694.1	0.826064	2.3748e-133	postive
GOT2	AL354694.1	0.553721	7.83e-44	postive
P4HA2	AL354694.1	0.745763	5.14085e-95	postive
PKM	AL354694.1	0.562376	1.91326e-45	postive
PKP2	AL354694.1	0.631933	2.55716e-60	postive
SPAG4	AL354694.1	0.563936	9.68167e-46	postive
B3GAT3	AC026979.2	0.571887	2.84739e-47	postive
NDUFV3	AC026979.2	0.59013	5.99954e-51	postive
PGLS	AC026979.2	0.628208	2.00017e-59	postive
ABCB6	AL513534.2	0.528976	1.78533e-39	postive
ALDOA	LINC01202	0.540037	2.23016e-41	postive
CACNA1H	LINC01202	0.519646	6.36123e-38	postive
CLDN3	LINC01202	0.730649	2.15498e-89	postive
ENO2	LINC01202	0.589923	6.6239e-51	postive
GOT1	LINC01202	0.626289	5.70837e-59	postive
GOT2	LINC01202	0.773367	2.17786e-106	postive
GPI	LINC01202	0.525335	7.29559e-39	postive
HK1	LINC01202	0.689077	1.00288e-75	postive
HOMER1	LINC01202	0.557035	1.91503e-44	postive
MDH1	LINC01202	0.543934	4.57931e-42	postive
P4HA2	LINC01202	0.672205	8.13637e-71	postive
PFKP	LINC01202	0.553585	8.29275e-44	postive
PKM	LINC01202	0.641522	1.12423e-62	postive
PKP2	LINC01202	0.59495	5.8513e-52	postive
ABCB6	AL365330.1	0.534086	2.40561e-40	postive
ANKZF1	AL365330.1	0.689393	8.05866e-76	postive
ARTN	AL365330.1	0.535874	1.18316e-40	postive
IDUA	AL365330.1	0.629658	9.01253e-60	postive
NASP	AL365330.1	0.629167	1.1812e-59	postive
ECD	AL589765.1	0.561418	2.90054e-45	postive
ZNF292	AL589765.1	0.501166	5.48014e-35	postive
GMPPA	AC009404.1	0.500836	6.15976e-35	postive
ABCB6	AP003392.5	0.501383	5.07436e-35	postive
ANKZF1	AP003392.5	0.534437	2.0929e-40	postive
AGL	FAM198B-AS1	0.504018	1.9833e-35	postive
ABCB6	AC022296.4	0.558763	9.12768e-45	postive
ANKZF1	AC022296.4	0.568754	1.15597e-46	postive
ENO3	AC022296.4	0.519418	6.93e-38	postive
GNE	AC092910.3	0.508363	4.14022e-36	postive
PAXIP1	AC092910.3	0.536256	1.01627e-40	postive
ZNF292	AC092910.3	0.626662	4.65989e-59	postive
ALDH2	AC136475.2	0.552049	1.58451e-43	postive
GALK1	AC138207.2	0.557809	1.37478e-44	postive
NDUFV3	AC138207.2	0.701928	1.07217e-79	postive
PGLS	AC138207.2	0.671874	1.00762e-70	postive
GNE	TRAF3IP2-AS1	0.523822	1.30268e-38	postive
ZNF292	TRAF3IP2-AS1	0.717361	9.33046e-85	postive
UGP2	GAS6-DT	0.504792	1.50298e-35	postive
B4GALT1	AC006033.2	0.545842	2.09317e-42	postive
DSC2	AC006033.2	0.605497	3.12412e-54	postive
GALM	AC006033.2	0.56654	3.08298e-46	postive
IL13RA1	AC006033.2	0.667388	1.7899e-69	postive
NASP	AL160006.1	0.57353	1.35758e-47	postive
GUSB	AC135050.6	0.536611	8.81916e-41	postive
ABCB6	AL133215.1	0.536669	8.61741e-41	postive
ANKZF1	AL133215.1	0.548184	7.95646e-43	postive
PGLS	PANTR1	0.550301	3.29482e-43	postive
GUSB	AP002807.1	0.511666	1.23905e-36	postive
IDUA	CIRBP-AS1	0.520559	4.5056e-38	postive
NASP	CIRBP-AS1	0.539467	2.80648e-41	postive
RBCK1	CIRBP-AS1	0.555551	3.60397e-44	postive
NASP	AC004801.6	0.511411	1.3606e-36	postive
ENO2	AP001267.2	0.658818	3.80115e-67	postive
GOT1	AP001267.2	0.649889	8.40329e-65	postive
MDH1	AP001267.2	0.623441	2.67118e-58	postive
PPFIA4	AP001267.2	0.601404	2.4354e-53	postive
ABCB6	AL449403.1	0.544395	3.79199e-42	postive
ANKZF1	AL449403.1	0.542424	8.4794e-42	postive
ABCB6	AL359715.2	0.509191	3.06369e-36	postive
ANKZF1	AL359715.2	0.568311	1.40755e-46	postive
ABCB6	SNHG12	0.555339	3.94457e-44	postive
AKR1A1	SNHG12	0.509089	3.17972e-36	postive
ANKZF1	SNHG12	0.662934	2.96325e-68	postive
ARTN	SNHG12	0.554917	4.71916e-44	postive
ENO3	SNHG12	0.554708	5.15723e-44	postive
GALE	SNHG12	0.52156	3.08425e-38	postive
IDUA	SNHG12	0.622243	5.08785e-58	postive
NASP	SNHG12	0.635887	2.79305e-61	postive
ANKZF1	AC092802.2	0.50136	5.11559e-35	postive
ANG	HHLA3	0.523553	1.44377e-38	postive
ECD	HHLA3	-0.554178	6.45383e-44	negative
GALM	HHLA3	0.542739	7.45832e-42	postive
ZNF292	HHLA3	-0.500878	6.06871e-35	negative
ALDH3A1	AC005487.1	0.794965	1.77905e-116	postive
GCK	AC005487.1	0.573628	1.29902e-47	postive
GAL3ST1	TYMSOS	0.505852	1.02659e-35	postive
LHPP	TYMSOS	0.509504	2.73323e-36	postive
AK4	BX322234.1	0.547541	1.0385e-42	postive
CHST6	BX322234.1	0.51335	6.66501e-37	postive
ABCB6	AC011481.1	0.631926	2.56643e-60	postive
ANKZF1	AC011481.1	0.729512	5.50649e-89	postive
ENO3	AC011481.1	0.552604	1.25426e-43	postive
IDUA	AC011481.1	0.5863	3.70965e-50	postive
GPI	SLC25A21-AS1	-0.506838	7.19187e-36	negative
HS2ST1	SLC25A21-AS1	-0.561376	2.95424e-45	negative
LDHA	SLC25A21-AS1	-0.563702	1.07295e-45	negative
PSMC4	MZF1-AS1	0.506737	7.46164e-36	postive
NASP	ZNF433-AS1	0.578736	1.26294e-48	postive
RARS1	ZNF433-AS1	0.530946	8.27813e-40	postive
ANKZF1	AC115099.1	0.519055	7.94612e-38	postive
ENO2	AC009019.1	0.650802	4.87736e-65	postive
GOT1	AC009019.1	0.613626	4.834e-56	postive
MDH1	AC009019.1	0.569642	7.78258e-47	postive
PPFIA4	AC009019.1	0.606012	2.40765e-54	postive
GALM	AC004921.1	0.609686	3.70089e-55	postive
ZNF292	NCBP2-AS1	0.524537	9.91042e-39	postive
CHST1	AC022400.1	0.550748	2.73322e-43	postive
ENO2	AC022400.1	0.68459	2.18475e-74	postive
GOT1	AC022400.1	0.76292	6.6783e-102	postive
HK1	AC022400.1	0.58948	8.18864e-51	postive
HOMER1	AC022400.1	0.582679	2.03138e-49	postive
MDH1	AC022400.1	0.713083	2.54901e-83	postive
PPFIA4	AC022400.1	0.751718	2.42578e-97	postive
UGP2	AC022400.1	0.528202	2.41139e-39	postive
NASP	FOXD3-AS1	0.500062	8.10153e-35	postive
ARPP19	DCTN1-AS1	0.61174	1.28528e-55	postive
CHST1	DCTN1-AS1	0.509163	3.09433e-36	postive
ENO2	DCTN1-AS1	0.833	1.40982e-137	postive
GOT1	DCTN1-AS1	0.939972	3.14217e-248	postive
GOT2	DCTN1-AS1	0.5538	7.57384e-44	postive
GPI	DCTN1-AS1	0.626221	5.92405e-59	postive
HK1	DCTN1-AS1	0.737116	9.44484e-92	postive
HOMER1	DCTN1-AS1	0.70745	1.81061e-81	postive
MDH1	DCTN1-AS1	0.920996	6.55878e-218	postive
ME1	DCTN1-AS1	0.653706	8.54778e-66	postive
NDST3	DCTN1-AS1	0.540161	2.12141e-41	postive
PPFIA4	DCTN1-AS1	0.841363	6.11746e-143	postive
STMN1	DCTN1-AS1	0.535278	1.4992e-40	postive
UGP2	DCTN1-AS1	0.686166	7.44768e-75	postive
CHST1	LINC01574	0.513671	5.91865e-37	postive
ENO2	LINC01574	0.767272	9.64558e-104	postive
GOT1	LINC01574	0.859679	7.41269e-156	postive
GOT2	LINC01574	0.543593	5.26529e-42	postive
GPI	LINC01574	0.663511	2.0661e-68	postive
HK1	LINC01574	0.725114	1.985e-87	postive
HOMER1	LINC01574	0.617932	5.05341e-57	postive
MDH1	LINC01574	0.83247	3.01001e-137	postive
ME1	LINC01574	0.669826	3.77051e-70	postive
NDST3	LINC01574	0.518178	1.10474e-37	postive
PPFIA4	LINC01574	0.802968	1.5819e-120	postive
UGP2	LINC01574	0.689433	7.83589e-76	postive
ALDH3A1	AC093689.1	0.669112	5.95904e-70	postive
ZNF292	AC115618.2	0.55963	6.28567e-45	postive
ALDH3A1	AL645924.1	0.624232	1.743e-58	postive
ECD	EDRF1-DT	0.537414	6.39991e-41	postive
PLOD1	EDRF1-DT	-0.501938	4.16684e-35	negative
PSMC4	EDRF1-DT	-0.558737	9.23256e-45	negative
ZNF292	AL162426.1	0.529943	1.22478e-39	postive
ABCB6	AC048341.2	0.554479	5.68303e-44	postive
ANKZF1	AC048341.2	0.585474	5.4775e-50	postive
IDUA	AC048341.2	0.577421	2.30983e-48	postive
NASP	AC048341.2	0.568056	1.57657e-46	postive
ZNF292	AP003392.1	0.51825	1.07555e-37	postive
NASP	AC099792.1	0.54525	2.6708e-42	postive
ARPP19	LINC00390	0.533178	3.44251e-40	postive
ENO2	LINC00390	0.678821	1.05813e-72	postive
GOT1	LINC00390	0.727264	3.47138e-88	postive
HK1	LINC00390	0.604615	4.87378e-54	postive
HOMER1	LINC00390	0.654155	6.51846e-66	postive
MDH1	LINC00390	0.699538	6.09489e-79	postive
NDST3	LINC00390	0.523977	1.22795e-38	postive
PPFIA4	LINC00390	0.700318	3.46384e-79	postive
ALDH3A2	AL512353.1	0.512076	1.06587e-36	postive
ANG	AL512353.1	0.532382	4.71106e-40	postive
B3GAT1	AL512353.1	-0.504213	1.84971e-35	negative
CD44	AL512353.1	0.50844	4.025e-36	postive
DSC2	AL512353.1	0.502371	3.57196e-35	postive
GALM	AL512353.1	0.589722	7.29154e-51	postive
IL13RA1	AL512353.1	0.602842	1.18775e-53	postive
PYGL	AL512353.1	0.504775	1.51196e-35	postive
ABCB6	AP001062.1	0.589706	7.34923e-51	postive
ANKZF1	AP001062.1	0.61225	9.87108e-56	postive
IDUA	AP001062.1	0.563881	9.91878e-46	postive
RBCK1	AP001062.1	0.56547	4.94059e-46	postive
ANKZF1	AC020978.3	0.557789	1.38656e-44	postive
NDUFV3	PPP4R3B-DT	0.528564	2.0953e-39	postive
ANKZF1	AC106820.3	0.505724	1.07511e-35	postive
NDUFV3	AC106820.3	0.523657	1.38756e-38	postive
RBCK1	AC106820.3	0.564925	6.2771e-46	postive
AKR1A1	AC010247.1	0.507661	5.34089e-36	postive
GALM	AC010247.1	0.508103	4.54937e-36	postive
IL13RA1	AC010247.1	0.62711	3.6485e-59	postive
CASP6	LINC01426	0.587799	1.82356e-50	postive
CHPF2	LINC01426	0.61774	5.59304e-57	postive
GALM	LINC01426	0.538149	4.76675e-41	postive
GUSB	LINC01426	0.5663	3.42854e-46	postive
HSPA5	LINC01426	0.52943	1.49618e-39	postive
KDELR3	LINC01426	0.584396	9.09227e-50	postive
PYGL	LINC01426	0.660431	1.4046e-67	postive
ARPP19	AC018685.2	0.517218	1.58303e-37	postive
ENO2	AC018685.2	0.58441	9.03554e-50	postive
GOT1	AC018685.2	0.586871	2.83214e-50	postive
HOMER1	AC018685.2	0.521301	3.40245e-38	postive
MDH1	AC018685.2	0.558345	1.0925e-44	postive
PPFIA4	AC018685.2	0.569522	8.20962e-47	postive
B4GALT1	AL357033.4	0.596617	2.59212e-52	postive
CXCR4	AL357033.4	0.550632	2.86996e-43	postive
GALM	AL357033.4	0.651502	3.21191e-65	postive
GLRX	AL357033.4	0.555972	3.01341e-44	postive
HK3	AL357033.4	0.616155	1.28845e-56	postive
ISG20	AL357033.4	0.582314	2.40842e-49	postive
SLC16A3	AL357033.4	0.523313	1.58231e-38	postive
ARTN	PTOV1-AS1	0.585311	5.91584e-50	postive
NASP	PTOV1-AS1	0.583783	1.21228e-49	postive
PSMC4	PTOV1-AS1	0.532703	4.15104e-40	postive
ARTN	CCDC28A-AS1	0.51879	8.7795e-38	postive
AURKA	CCDC28A-AS1	0.537362	6.5332e-41	postive
CDK1	CCDC28A-AS1	0.546595	1.53515e-42	postive
CENPA	CCDC28A-AS1	0.503787	2.15487e-35	postive
DEPDC1	CCDC28A-AS1	0.507207	6.29498e-36	postive
HMMR	CCDC28A-AS1	0.552138	1.52623e-43	postive
KIF20A	CCDC28A-AS1	0.55388	7.32132e-44	postive
NASP	CCDC28A-AS1	0.537538	6.08972e-41	postive
B3GALT6	SNHG9	0.515548	2.95113e-37	postive
B3GAT3	SNHG9	0.56828	1.42708e-46	postive
NDUFV3	SNHG9	0.592302	2.11201e-51	postive
PGLS	SNHG9	0.602719	1.26293e-53	postive
SLC25A10	SNHG9	0.554659	5.26435e-44	postive
ABCB6	AC007292.1	0.626575	4.88638e-59	postive
ANKZF1	AC007292.1	0.581896	2.92509e-49	postive
ENO3	AC007292.1	0.507937	4.83168e-36	postive
NDUFV3	AC007292.1	0.507103	6.53569e-36	postive
GMPPA	LINC01102	0.576746	3.14694e-48	postive
AURKA	LINC01224	0.676312	5.56577e-72	postive
CDK1	LINC01224	0.531642	6.30031e-40	postive
CENPA	LINC01224	0.664918	8.53615e-69	postive
DEPDC1	LINC01224	0.605275	3.49398e-54	postive
HMMR	LINC01224	0.500354	7.30568e-35	postive
KIF20A	LINC01224	0.663728	1.80264e-68	postive
ABCB6	MELTF-AS1	0.513466	6.38541e-37	postive
ANKZF1	MELTF-AS1	0.534586	1.97299e-40	postive
NDUFV3	MELTF-AS1	0.561861	2.39343e-45	postive
PGLS	MELTF-AS1	0.511354	1.38923e-36	postive
RBCK1	MELTF-AS1	0.537273	6.77002e-41	postive
ABCB6	AL445222.1	0.501162	5.48921e-35	postive
ARTN	AC004223.4	0.526502	4.65396e-39	postive
NASP	AC004223.4	0.543952	4.54516e-42	postive
B4GALT4	LINC00159	0.546984	1.30735e-42	postive
CACNA1H	LINC00159	0.627158	3.55462e-59	postive
CLDN3	LINC00159	0.912489	1.03607e-206	postive
GOT2	LINC00159	0.547938	8.80933e-43	postive
P4HA2	LINC00159	0.845481	1.07139e-145	postive
PKM	LINC00159	0.661768	6.13129e-68	postive
PKP2	LINC00159	0.665536	5.78226e-69	postive
SPAG4	LINC00159	0.634298	6.82537e-61	postive
ABCB6	AC103739.2	0.500451	7.0602e-35	postive
ANKZF1	AC103739.2	0.533644	2.86408e-40	postive
NSDHL	AL359198.1	0.518175	1.1062e-37	postive
ENO2	AC007922.3	0.618618	3.5168e-57	postive
GOT1	AC007922.3	0.676056	6.58935e-72	postive
HOMER1	AC007922.3	0.512441	9.3169e-37	postive
MDH1	AC007922.3	0.664197	1.34328e-68	postive
PPFIA4	AC007922.3	0.526038	5.56706e-39	postive
ABCB6	AL136531.1	0.564017	9.34766e-46	postive
ANKZF1	AL136531.1	0.611115	1.77462e-55	postive
B3GAT3	AL023803.1	0.511017	1.57221e-36	postive
B4GALT7	AL023803.1	0.511846	1.1598e-36	postive
NDUFV3	AL023803.1	0.61788	5.19557e-57	postive
PGLS	AL023803.1	0.602098	1.72297e-53	postive
ARPP19	BASP1-AS1	0.50222	3.76839e-35	postive
ENO2	BASP1-AS1	0.652845	1.43538e-65	postive
GOT1	BASP1-AS1	0.676819	3.9844e-72	postive
HK1	BASP1-AS1	0.576102	4.2221e-48	postive
HOMER1	BASP1-AS1	0.574065	1.06588e-47	postive
MDH1	BASP1-AS1	0.594758	6.42367e-52	postive
PPFIA4	BASP1-AS1	0.687711	2.57694e-75	postive
B3GAT3	AC133552.5	0.613532	5.07629e-56	postive
B4GALT7	AC133552.5	0.609566	3.93589e-55	postive
GALK1	AC133552.5	0.6166	1.01998e-56	postive
NDUFV3	AC133552.5	0.671282	1.47701e-70	postive
PGLS	AC133552.5	0.713892	1.37027e-83	postive
ABCB6	AL355987.4	0.588688	1.19467e-50	postive
ANKZF1	AL355987.4	0.687109	3.90171e-75	postive
ENO3	AL355987.4	0.589619	7.66021e-51	postive
IDUA	AL355987.4	0.58202	2.76091e-49	postive
B3GAT3	CH17-340M24.3	0.68034	3.84414e-73	postive
B4GALT7	CH17-340M24.3	0.602809	1.20756e-53	postive
GALK1	CH17-340M24.3	0.502261	3.71341e-35	postive
NDUFV3	CH17-340M24.3	0.673576	3.33964e-71	postive
PGLS	CH17-340M24.3	0.716007	2.67616e-84	postive
SOD1	CH17-340M24.3	0.502025	4.03996e-35	postive
TALDO1	CH17-340M24.3	0.551483	2.00884e-43	postive
ARTN	AC022150.2	0.567679	1.86274e-46	postive
NASP	AC022150.2	0.684985	1.66936e-74	postive
ABCB6	LINC02615	0.521492	3.16404e-38	postive
ANKZF1	LINC02615	0.604012	6.60398e-54	postive
AGL	AC098851.1	0.500111	7.96286e-35	postive
CASP6	AC098851.1	0.590778	4.39773e-51	postive
GALM	AC098851.1	0.516559	2.02496e-37	postive
GMPPB	AC098851.1	0.526848	4.07351e-39	postive
AKR1A1	WARS2-IT1	0.521694	2.9307e-38	postive
GALM	NEAT1	0.518768	8.85227e-38	postive
GLRX	NEAT1	0.509756	2.49304e-36	postive
ABCB6	AP001412.1	0.574023	1.08603e-47	postive
ANKZF1	AP001412.1	0.590472	5.09315e-51	postive
IDUA	AP001412.1	0.605849	2.61424e-54	postive
RBCK1	AP001412.1	0.522736	1.97168e-38	postive
LHPP	DNAH17-AS1	0.6771	3.31141e-72	postive
CLDN3	AL358154.1	0.544815	3.192e-42	postive
P4HA2	AL358154.1	0.522234	2.38673e-38	postive
ALDH9A1	CASC2	0.536294	1.00068e-40	postive
ZNF292	AP001432.1	0.509379	2.86049e-36	postive
AURKA	LINC01775	0.692462	9.45556e-77	postive
CDK1	LINC01775	0.612753	7.60805e-56	postive
CENPA	LINC01775	0.65921	2.98475e-67	postive
DEPDC1	LINC01775	0.663866	1.65397e-68	postive
HMMR	LINC01775	0.595044	5.58935e-52	postive
KIF20A	LINC01775	0.707651	1.55717e-81	postive
NASP	LINC01775	0.519107	7.79289e-38	postive
PGM2	LINC01775	0.500935	5.94854e-35	postive
CASP6	LINC01831	0.537771	5.54662e-41	postive
LHPP	AC082651.1	0.645775	9.50984e-64	postive
GALM	AL157392.3	-0.502175	3.83016e-35	negative
ZNF292	AL157392.3	0.616665	9.8576e-57	postive
ARPP19	LINC02857	0.604155	6.14567e-54	postive
CHST1	LINC02857	0.511719	1.21533e-36	postive
ENO2	LINC02857	0.772908	3.46756e-106	postive
GOT1	LINC02857	0.876738	1.18303e-169	postive
GOT2	LINC02857	0.526628	4.43371e-39	postive
GPI	LINC02857	0.609275	4.56918e-55	postive
HK1	LINC02857	0.738765	2.30664e-92	postive
HOMER1	LINC02857	0.707566	1.66035e-81	postive
MDH1	LINC02857	0.841422	5.59325e-143	postive
ME1	LINC02857	0.643685	3.21707e-63	postive
NDST3	LINC02857	0.560811	3.77359e-45	postive
PFKP	LINC02857	0.514782	3.92246e-37	postive
PGAM1	LINC02857	0.502787	3.07936e-35	postive
PPFIA4	LINC02857	0.787812	5.26844e-113	postive
UGP2	LINC02857	0.642862	5.18511e-63	postive
ARPP19	AL049796.1	0.536723	8.43451e-41	postive
ENO2	AL049796.1	0.677512	2.52079e-72	postive
GOT1	AL049796.1	0.710487	1.84125e-82	postive
GPI	AL049796.1	0.53686	7.98494e-41	postive
HK1	AL049796.1	0.605984	2.44129e-54	postive
HOMER1	AL049796.1	0.655631	2.66541e-66	postive
MDH1	AL049796.1	0.670707	2.1399e-70	postive
ME1	AL049796.1	0.525273	7.4707e-39	postive
NDST3	AL049796.1	0.5837	1.26024e-49	postive
PPFIA4	AL049796.1	0.758713	3.68885e-100	postive
UGP2	AL049796.1	0.525949	5.76114e-39	postive
ALDH3A1	AC010425.1	0.646777	5.28548e-64	postive
ZNF292	AC008567.2	0.559647	6.23904e-45	postive
PMM2	LAMC1-AS1	0.562605	1.73156e-45	postive
EGFR	EGFR-AS1	0.770533	3.79041e-105	postive
ABCB6	AC138466.3	0.504069	1.94791e-35	postive
ABCB6	AC025682.1	0.584402	9.0675e-50	postive
ANKZF1	AC025682.1	0.594318	7.95631e-52	postive
LHPP	AL358216.1	0.522968	1.80538e-38	postive
NDUFV3	AC025162.2	0.522907	1.84758e-38	postive
PGLS	AC025162.2	0.537967	5.12849e-41	postive
CD44	AL356215.1	0.593176	1.38464e-51	postive
TPST1	AL356215.1	0.549685	4.2608e-43	postive
GMPPA	AC243830.2	0.583159	1.62305e-49	postive
ARPP19	LINC01018	0.502717	3.15718e-35	postive
CHST1	LINC01018	0.529484	1.46492e-39	postive
ENO2	LINC01018	0.719876	1.29709e-85	postive
GOT1	LINC01018	0.85179	4.43745e-150	postive
GPI	LINC01018	0.593207	1.36371e-51	postive
HK1	LINC01018	0.673513	3.47888e-71	postive
HOMER1	LINC01018	0.630938	4.44196e-60	postive
MDH1	LINC01018	0.814588	9.37572e-127	postive
ME1	LINC01018	0.668091	1.14383e-69	postive
NDST3	LINC01018	0.545681	2.23666e-42	postive
PPFIA4	LINC01018	0.766063	3.15965e-103	postive
UGP2	LINC01018	0.689418	7.91721e-76	postive
FUT8	AC016597.1	0.501739	4.47182e-35	postive
LHPP	AC016597.1	0.676517	4.86184e-72	postive
ZNF292	AC006042.3	0.560701	3.95716e-45	postive
LHPP	AC093159.1	0.677926	1.91695e-72	postive
GOT1	LINC00884	0.604093	6.34011e-54	postive
GPI	LINC00884	0.58698	2.68914e-50	postive
HK1	LINC00884	0.537904	5.25897e-41	postive
HOMER1	LINC00884	0.590632	4.71746e-51	postive
MDH1	LINC00884	0.582196	2.54421e-49	postive
ME1	LINC00884	0.512422	9.38328e-37	postive
PPFIA4	LINC00884	0.669193	5.65983e-70	postive
UGP2	LINC00884	0.574118	1.04031e-47	postive
ANKZF1	AC010326.3	0.565335	5.24324e-46	postive
ARTN	AC010326.3	0.556517	2.38852e-44	postive
GUSB	AC010326.3	0.501223	5.37116e-35	postive
NASP	AC010326.3	0.62045	1.32785e-57	postive
IL13RA1	AC022182.2	0.510342	2.01249e-36	postive
AKR1A1	AC018755.4	0.506165	9.1727e-36	postive
GLRX	AC018755.4	0.501982	4.10139e-35	postive
IL13RA1	AC018755.4	0.522223	2.39675e-38	postive
ALDOC	LINC00994	0.505269	1.26633e-35	postive
B3GALT6	AL445524.1	0.509942	2.32961e-36	postive
GUSB	AL445524.1	0.529314	1.56539e-39	postive
PGLS	AL445524.1	0.598038	1.28973e-52	postive
AGL	SNHG31	0.510656	1.794e-36	postive
COPB2	SNHG31	0.510832	1.68262e-36	postive
PDK3	SNHG31	0.519856	5.87574e-38	postive
ABCB6	AP000757.1	0.642659	5.83271e-63	postive
CASP6	AL133415.1	0.507234	6.23393e-36	postive
CD44	AL133415.1	0.585948	4.37957e-50	postive
GLRX	AL133415.1	0.548053	8.39862e-43	postive
PYGL	AL133415.1	0.531927	5.63395e-40	postive
SLC16A3	AL133415.1	0.518443	1.00008e-37	postive
TPST1	AL133415.1	0.505972	9.83326e-36	postive
RBCK1	IRF1-AS1	0.626834	4.242e-59	postive
IRS2	AL157762.1	0.514369	4.57218e-37	postive
ABCB6	MAPKAPK5-AS1	0.520688	4.29084e-38	postive
B3GAT3	MAPKAPK5-AS1	0.503121	2.73339e-35	postive
GMPPA	MAPKAPK5-AS1	0.558269	1.12845e-44	postive
HAX1	MAPKAPK5-AS1	0.520256	5.05296e-38	postive
NDUFV3	MAPKAPK5-AS1	0.604592	4.93157e-54	postive
POLR3K	MAPKAPK5-AS1	0.530478	9.94083e-40	postive
ABCB6	TMEM147-AS1	0.520038	5.48523e-38	postive
ANKZF1	TMEM147-AS1	0.672769	5.64457e-71	postive
IDUA	TMEM147-AS1	0.626473	5.16562e-59	postive
NASP	TMEM147-AS1	0.592161	2.26103e-51	postive
GUSB	AC080038.1	0.531218	7.44159e-40	postive
ALDH2	AL391834.1	0.584704	7.86812e-50	postive
ZNF292	AC011346.1	0.588569	1.26461e-50	postive
GAL3ST1	AC006058.1	0.616591	1.02477e-56	postive
ZNF292	AL353658.1	0.524442	1.02745e-38	postive
CHST6	AC008556.1	0.502785	3.08123e-35	postive
ALDH2	AL355916.2	0.515166	3.40097e-37	postive
ALDOC	AL355916.2	0.60145	2.38093e-53	postive
KIF2A	VCAN-AS1	0.500986	5.84145e-35	postive
VCAN	VCAN-AS1	0.73379	1.57365e-90	postive
ZNF292	VCAN-AS1	0.524238	1.11124e-38	postive
AKR1A1	AC093157.1	0.534542	2.00783e-40	postive
NASP	AC093157.1	0.530118	1.14421e-39	postive
ARPP19	BCDIN3D-AS1	0.521732	2.88828e-38	postive
ENO2	BCDIN3D-AS1	0.564499	7.56771e-46	postive
GOT1	BCDIN3D-AS1	0.546476	1.61254e-42	postive
HOMER1	BCDIN3D-AS1	0.525254	7.52647e-39	postive
PFKM	BCDIN3D-AS1	0.506084	9.44399e-36	postive
PPFIA4	BCDIN3D-AS1	0.55407	6.75705e-44	postive
GOT1	SNHG28	0.599539	6.14912e-53	postive
MDH1	SNHG28	0.579319	9.65179e-49	postive
ME1	SNHG28	0.51593	2.56047e-37	postive
PPFIA4	SNHG28	0.545261	2.658e-42	postive
UGP2	SNHG28	0.551392	2.08718e-43	postive
ADH1B	WDR86-AS1	0.556204	2.73019e-44	postive
DCN	WDR86-AS1	0.685884	9.03612e-75	postive
GOT1	AL355472.3	0.549097	5.44479e-43	postive
GPI	AL355472.3	0.519135	7.71179e-38	postive
MDH1	AL355472.3	0.567238	2.26479e-46	postive
PPFIA4	AL355472.3	0.539171	3.1624e-41	postive
UGP2	AL355472.3	0.533159	3.46942e-40	postive
PPFIA4	AC106795.2	0.527693	2.93698e-39	postive
ENO2	C17orf102	0.645362	1.2114e-63	postive
GOT1	C17orf102	0.62596	6.82843e-59	postive
HK1	C17orf102	0.545232	2.69e-42	postive
HOMER1	C17orf102	0.535657	1.28978e-40	postive
MDH1	C17orf102	0.593109	1.43034e-51	postive
PPFIA4	C17orf102	0.626326	5.5946e-59	postive
PAXIP1	AC004492.1	0.501261	5.29924e-35	postive
ZNF292	AC004492.1	0.532315	4.83705e-40	postive
AK4	AC127502.2	0.520508	4.59357e-38	postive
CASP6	AC127502.2	0.602547	1.37648e-53	postive
GALM	AC127502.2	0.559851	5.71432e-45	postive
GUSB	AC127502.2	0.52073	4.2228e-38	postive
P4HA2	AC127502.2	0.541143	1.42586e-41	postive
PLOD1	AC127502.2	0.50665	7.69988e-36	postive
SLC16A3	AC127502.2	0.502947	2.90887e-35	postive
SPAG4	AC127502.2	0.651573	3.07901e-65	postive
B3GAT3	RAP2C-AS1	-0.531792	5.93945e-40	negative
COPB2	RAP2C-AS1	0.538401	4.30922e-41	postive
KIF2A	RAP2C-AS1	0.560937	3.57208e-45	postive
ZNF292	RAP2C-AS1	0.516273	2.2533e-37	postive
ARPP19	AP001972.3	0.52163	3.00295e-38	postive
CHST1	AP001972.3	0.524748	9.13869e-39	postive
ENO2	AP001972.3	0.762984	6.2798e-102	postive
GOT1	AP001972.3	0.833082	1.25265e-137	postive
GPI	AP001972.3	0.592698	1.74452e-51	postive
HK1	AP001972.3	0.692758	7.67775e-77	postive
HOMER1	AP001972.3	0.674078	2.40657e-71	postive
MDH1	AP001972.3	0.803434	9.06172e-121	postive
ME1	AP001972.3	0.600338	4.13793e-53	postive
NDST3	AP001972.3	0.542039	9.9167e-42	postive
PPFIA4	AP001972.3	0.816567	7.3681e-128	postive
UGP2	AP001972.3	0.599103	7.62732e-53	postive
GALE	PINK1-AS	0.568634	1.21946e-46	postive
HS2ST1	PINK1-AS	0.608513	6.74783e-55	postive
NASP	PINK1-AS	0.59573	3.99989e-52	postive
PSMC4	PINK1-AS	0.543297	5.93993e-42	postive
CASP6	AC093388.1	0.533222	3.38352e-40	postive
ABCB6	AC008667.2	0.559787	5.87452e-45	postive
ANKZF1	AC008667.2	0.536741	8.37287e-41	postive
COPB2	Z68871.1	0.542527	8.13094e-42	postive
KIF2A	Z68871.1	0.583933	1.13014e-49	postive
RPE	Z68871.1	0.515268	3.2749e-37	postive
ZNF292	Z68871.1	0.514525	4.31566e-37	postive
ABCB6	AL096870.2	0.588367	1.39185e-50	postive
ANKZF1	AL096870.2	0.549326	4.94938e-43	postive
IDUA	AL096870.2	0.549339	4.92271e-43	postive
ARPP19	AC226101.1	0.510465	1.92431e-36	postive
ENO2	AC226101.1	0.721883	2.64495e-86	postive
GOT1	AC226101.1	0.792862	1.92746e-115	postive
HK1	AC226101.1	0.643855	2.91424e-63	postive
HOMER1	AC226101.1	0.605653	2.88653e-54	postive
MDH1	AC226101.1	0.771633	1.25696e-105	postive
ME1	AC226101.1	0.556255	2.67068e-44	postive
PPFIA4	AC226101.1	0.703827	2.66399e-80	postive
UGP2	AC226101.1	0.55552	3.65236e-44	postive
ANKZF1	AL513218.1	0.533123	3.51784e-40	postive
ENO2	HAR1A	0.657292	9.68899e-67	postive
GOT1	HAR1A	0.653484	9.77437e-66	postive
HK1	HAR1A	0.521659	2.97045e-38	postive
MDH1	HAR1A	0.606841	1.58141e-54	postive
PPFIA4	HAR1A	0.619098	2.72629e-57	postive
ANKZF1	AC011815.2	0.57657	3.41056e-48	postive
NASP	AC011815.2	0.505501	1.16507e-35	postive
B4GALT1	AC090559.1	0.581774	3.09563e-49	postive
DSC2	AC090559.1	0.649847	8.61431e-65	postive
IL13RA1	AC090559.1	0.71076	1.49707e-82	postive
[truncated: 4,259 more rows]
